# Supplementary material
Source: publisher site journal article supplement (https://www.dovepress.com/article/481338)
Supplement: Supplementary file 1 [file get_supplementary_file.php]

**Supplementary Figures**


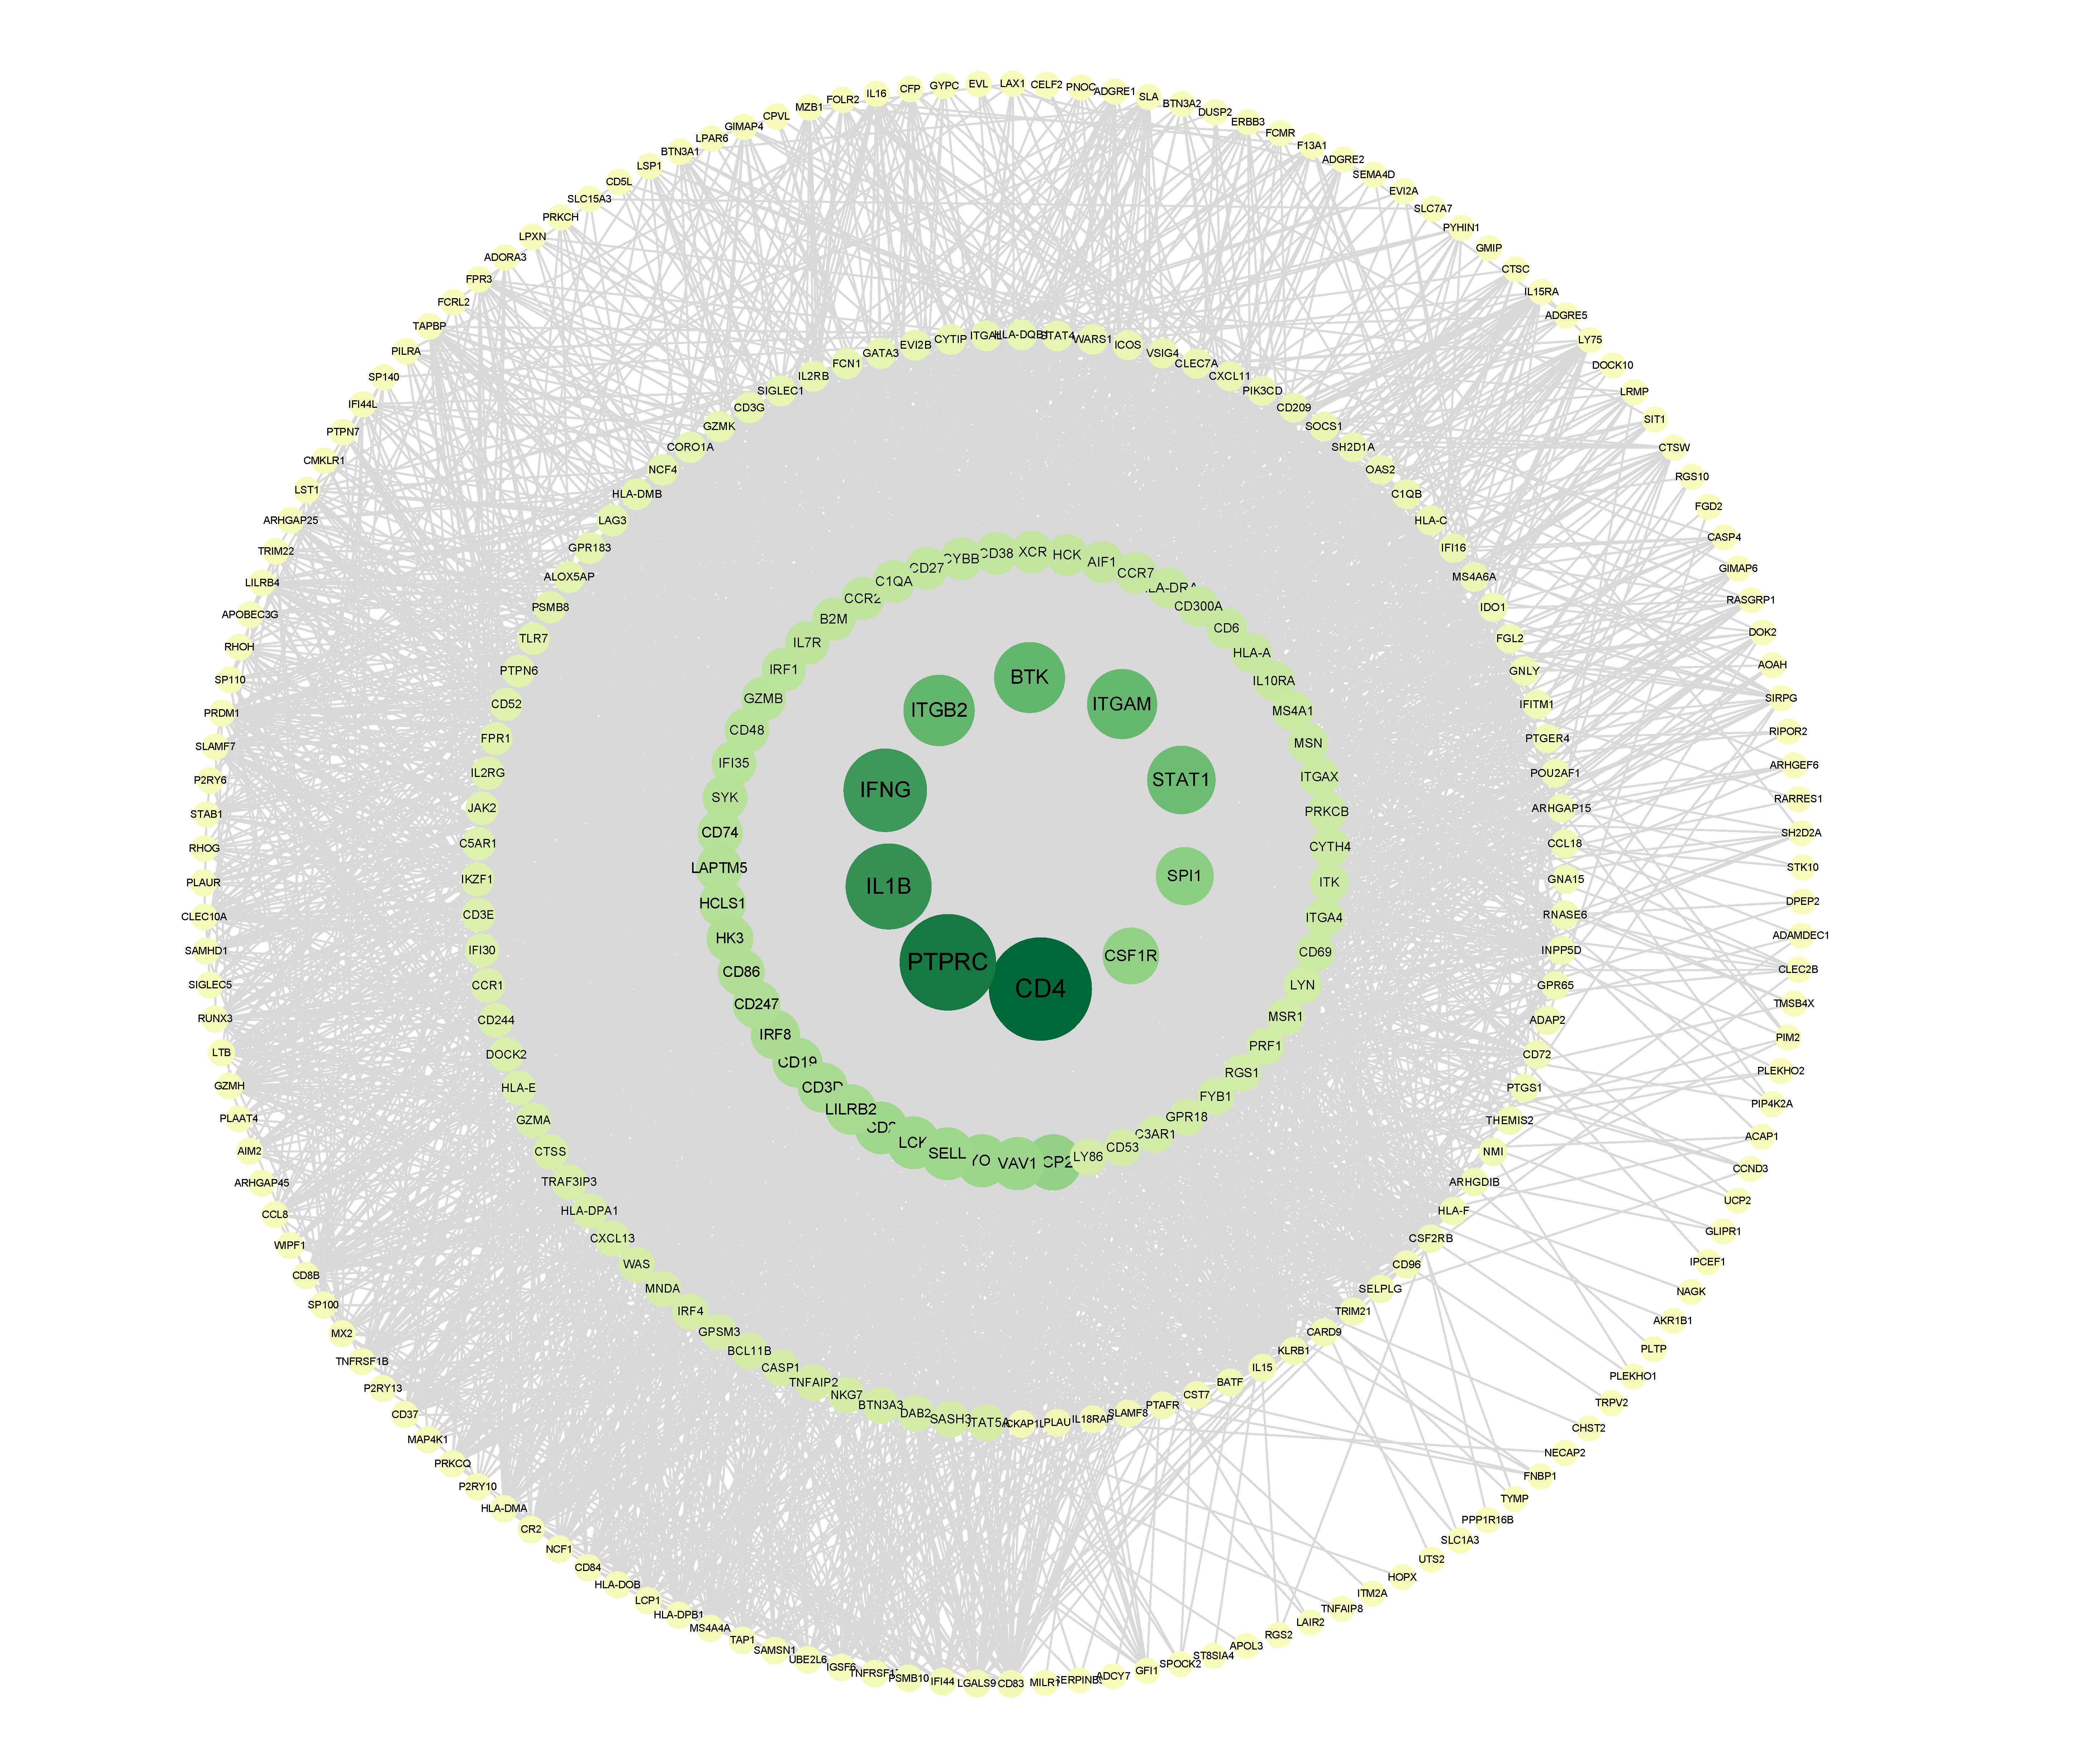


Figure S1. Protein-protein interaction network of dendritic cell-related genes.





Figure S2. Dendritic cell-related signature candidate genes. A, Forest plot of 37 dendritic cell-related signature candidate genes; B, Lollipop plot of 13 dendritic cell-related signature genes. HR, hazard ratio.





Figure S3. Survival Curves of 13 Dendritic Cell-Related Signature Genes. Survival curves are shown for 13 dendritic cell-related signature genes: SLC4A10 (A), CYP19A1 (B), CYP17A1 (C), NR0B1 (D), CLEC1B (E), ALLC (F), CHGA (G), CRIP1 (H), SLC34A2 (I), LTF (J), SLC6A20 (K), CHRDL1 (L), and PLA2G7 (M). OS, overall survival.


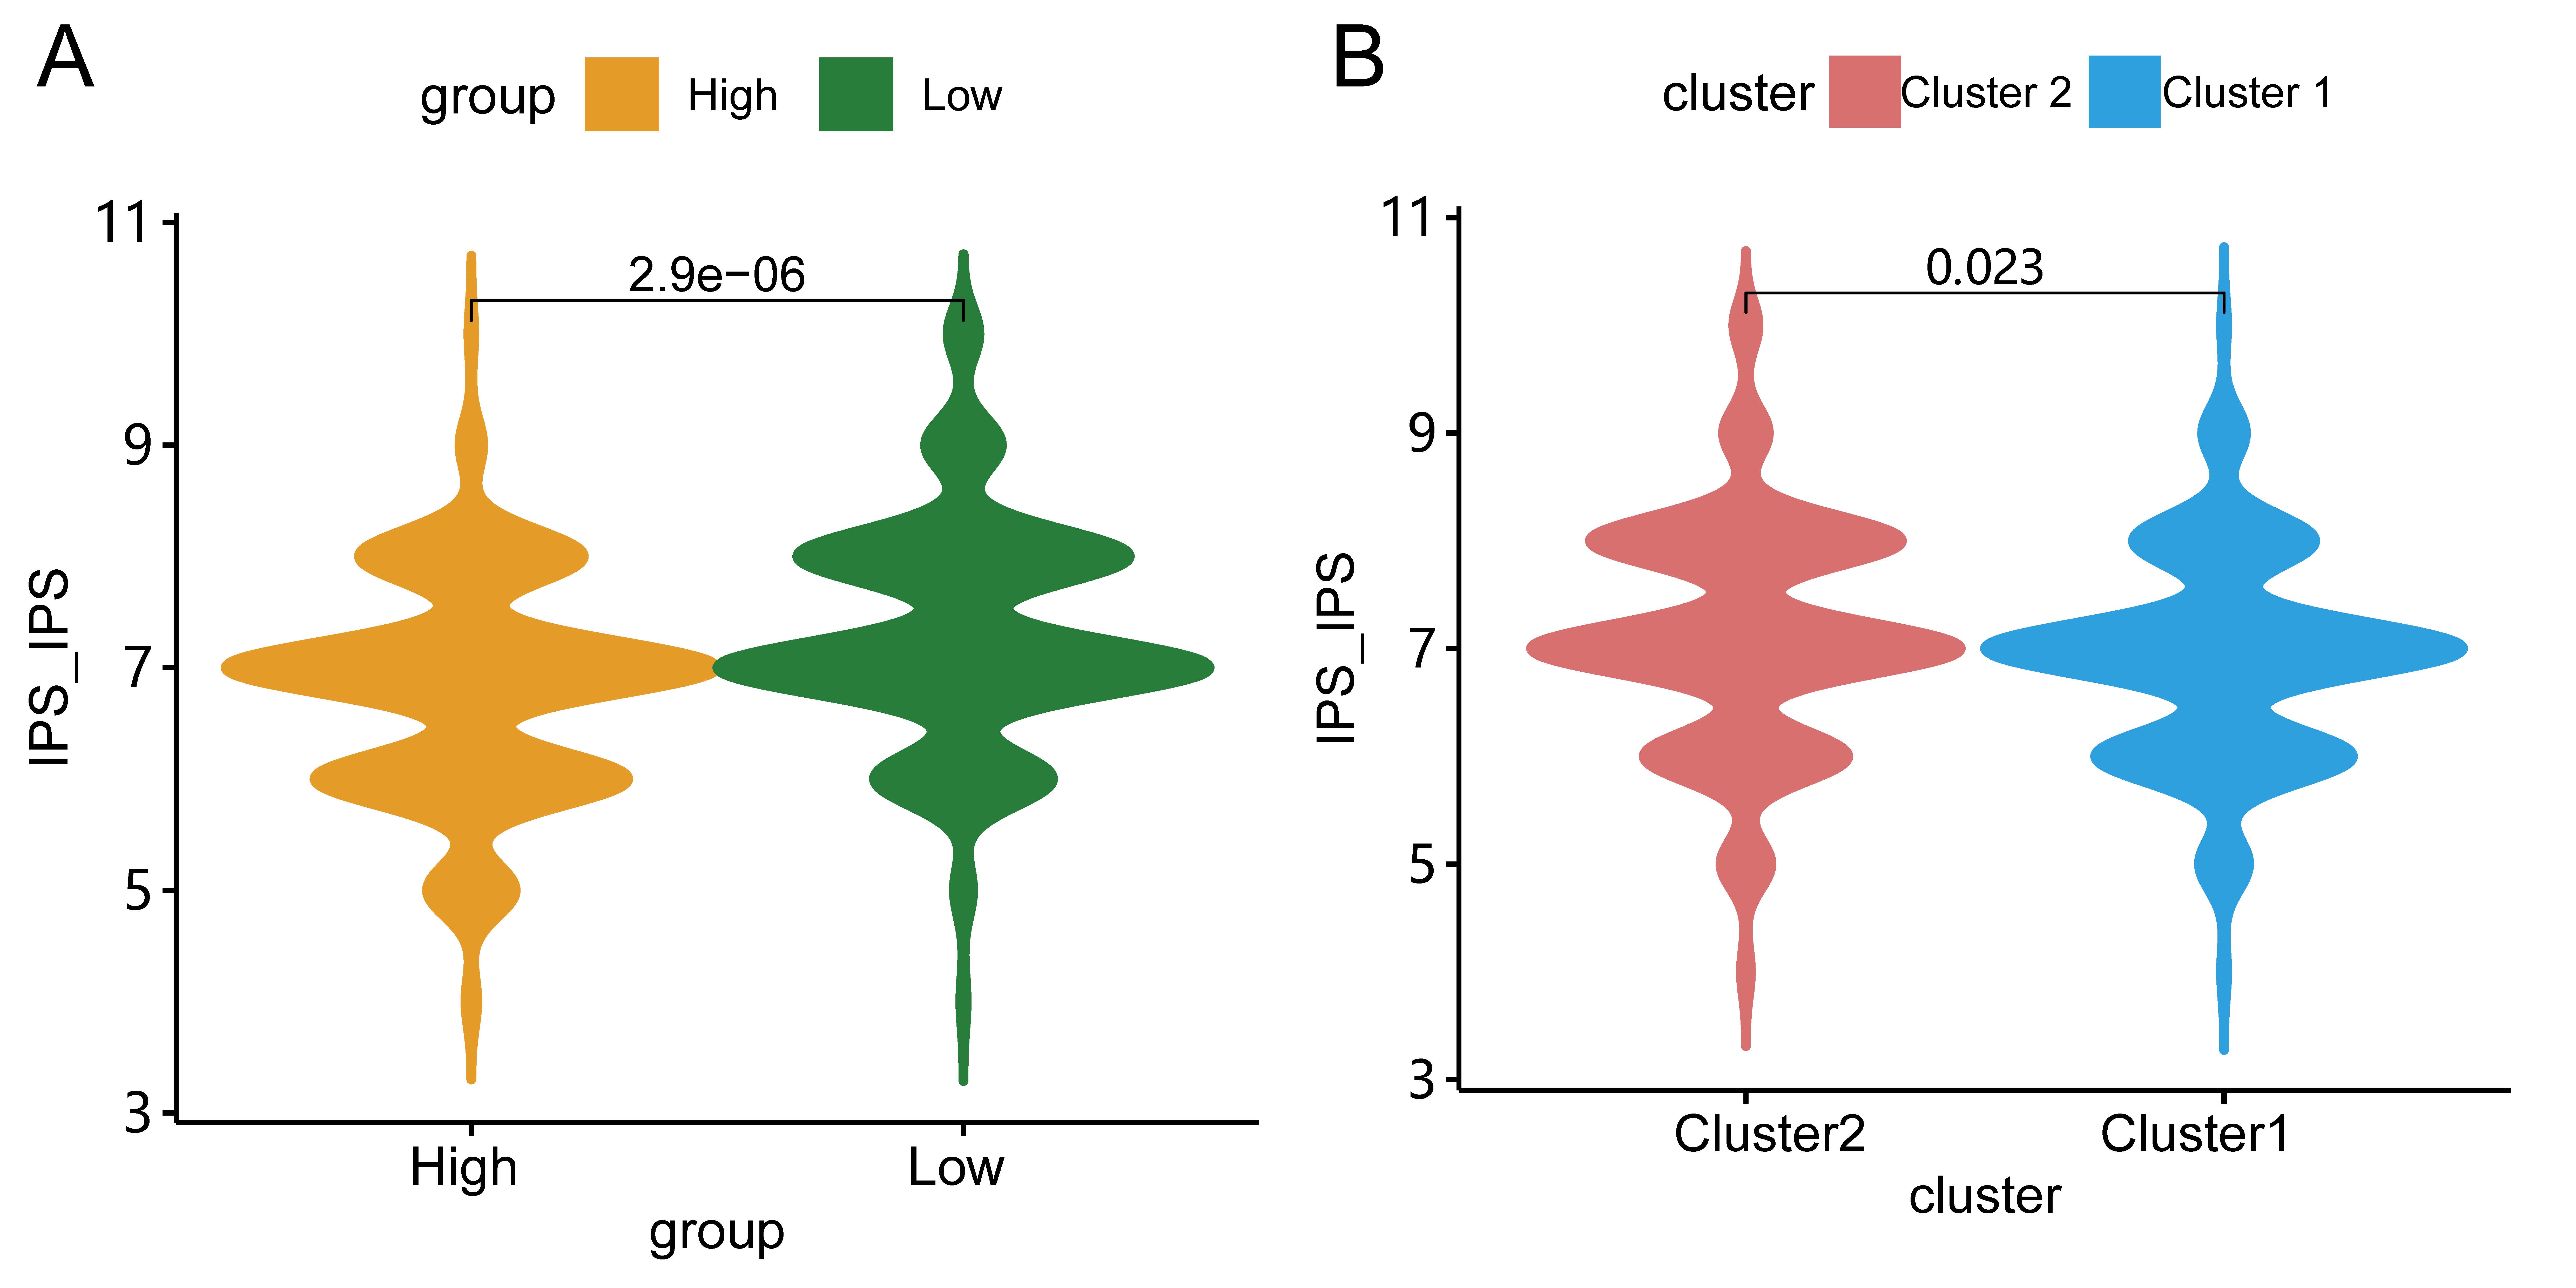


Figure S4. Violin plots of immunophenotype scores for DC-related risk groups (A) and clusters (B).





Figure S5. Drug sensitivity analysis of dendritic cell-related clusters for different drugs ( A-L). C1, cluster 1; C2, cluster 2.


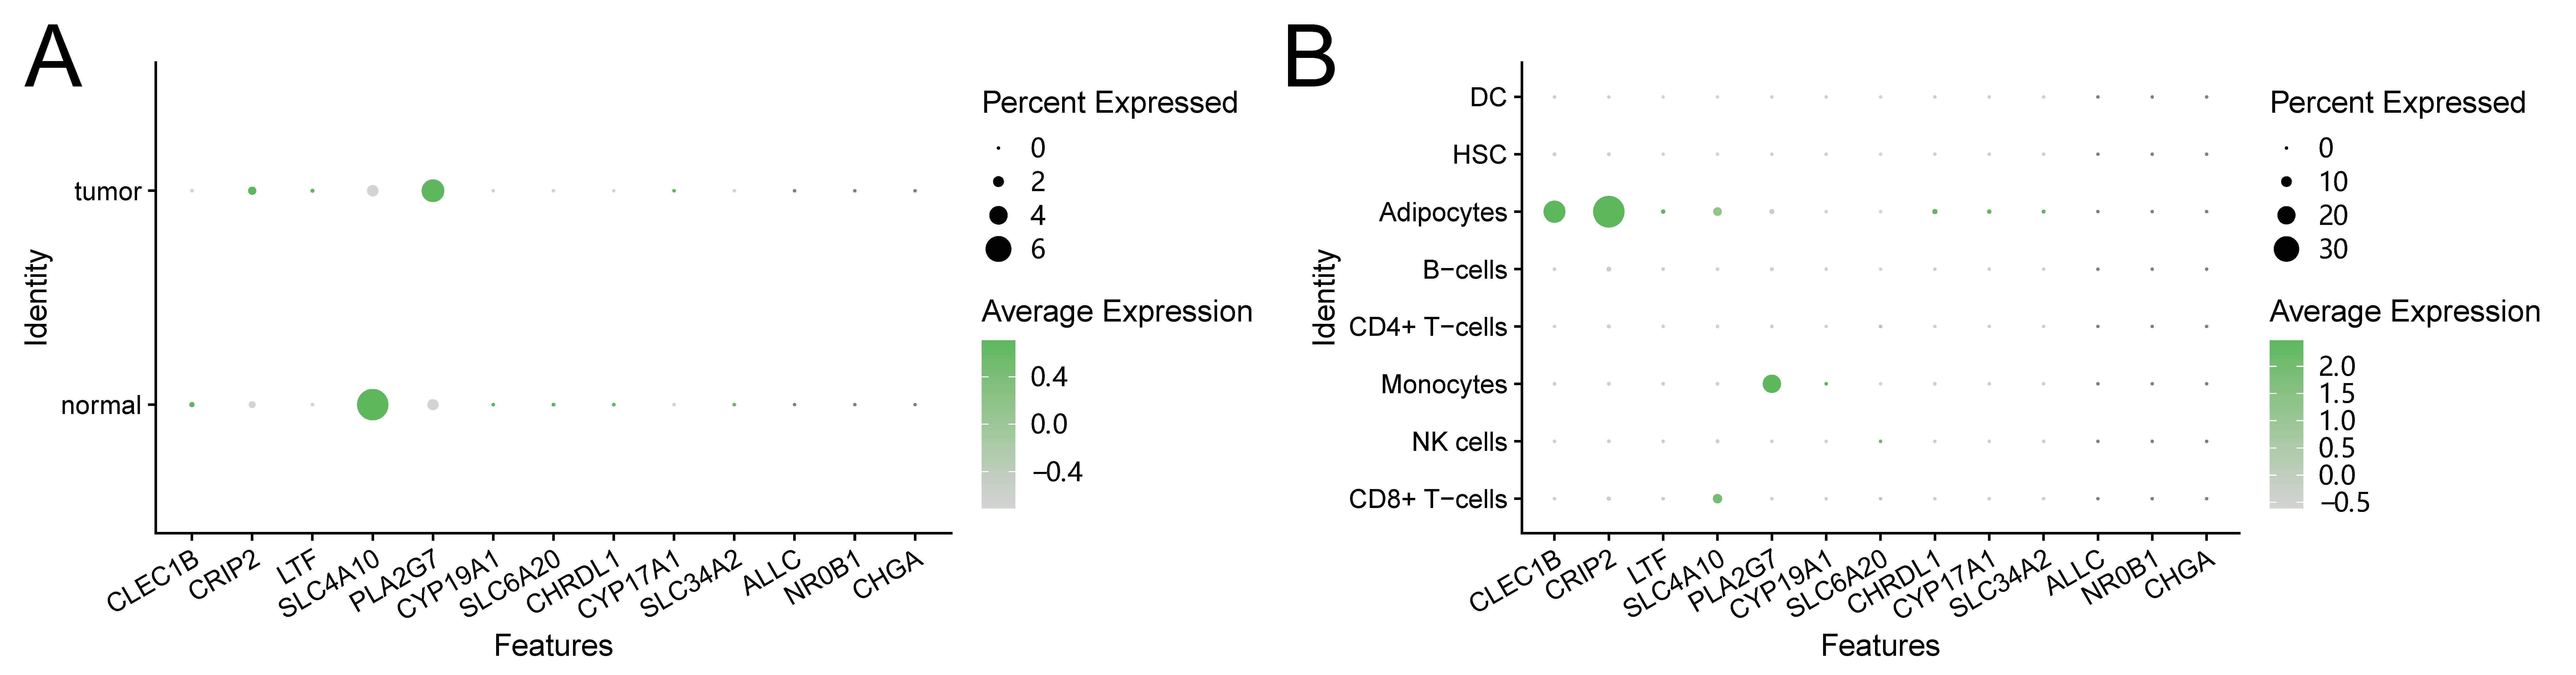


Figure S6. Bubble Plot of Expression of Dendritic Cell-Related Signature Genes in the GSE140228 Dataset. A, Expression of dendritic cell-related signature genes in tumor versus normal tissues; B, Expression of dendritic cell-related signature genes among different immune cell types. DC, dendritic cell; HSC, hematopoietic stem cell; NK, natural killer cell.


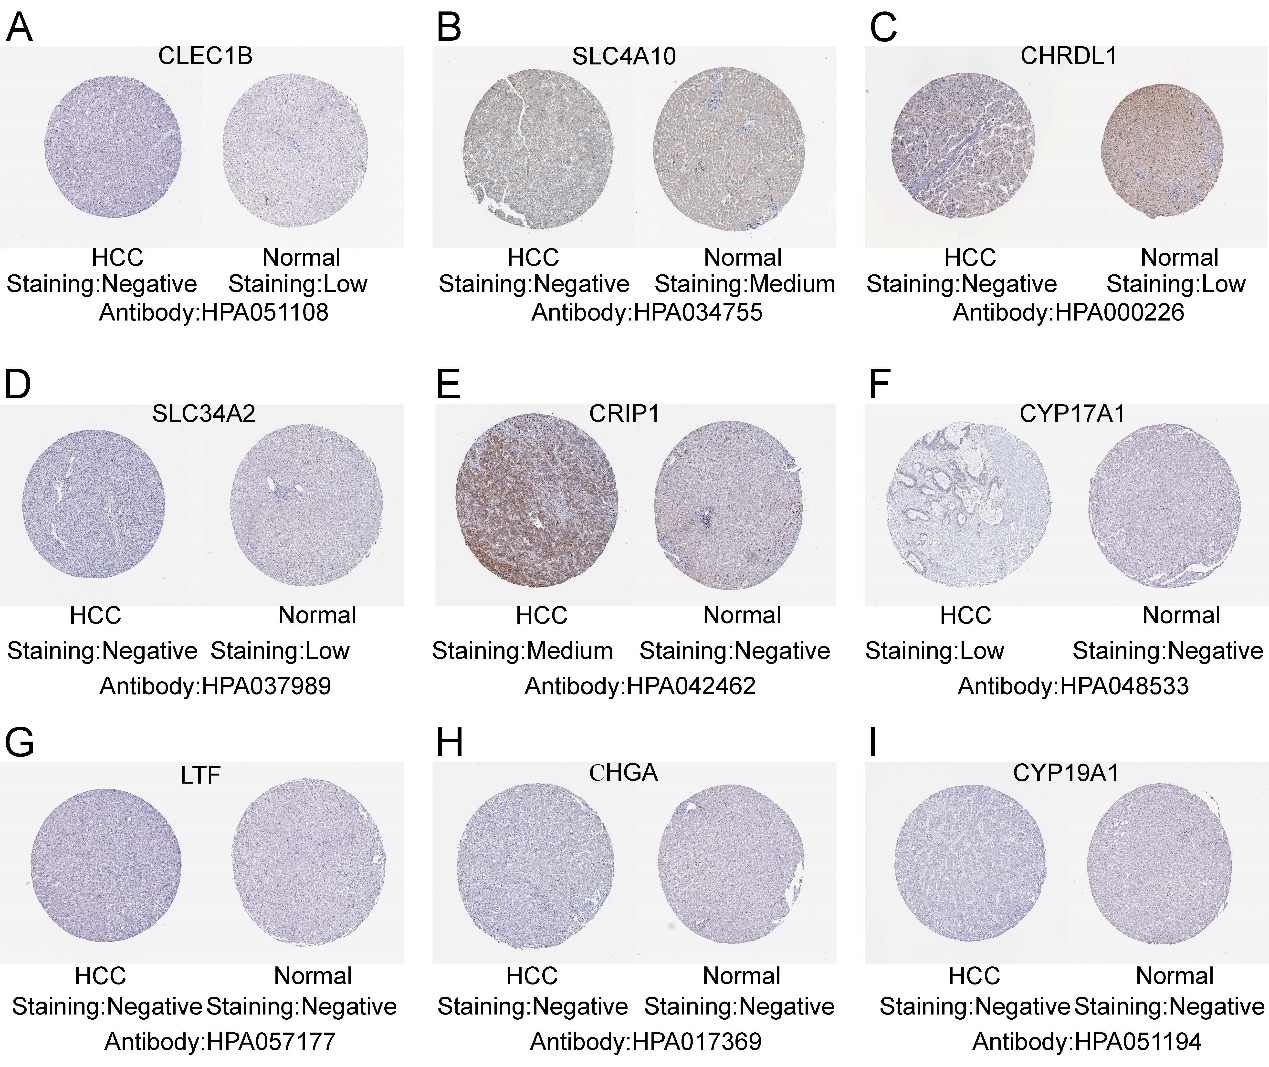


Figure S7. Immunohistochemistry images of dendritic cell-related signature genes (A-I) from the Human Protein Atlas database. HCC, hepatocellular carcinoma.

**Suplementary Tables**

**Table S1 The data set used in this study (n=8)**

| **Data set number** | **Platform** | **Data type** | **Number of samples/cells** | **Treatment** |
| --- | --- | --- | --- | --- |
| TCGA-LIHC | Illumina RNAseq | RNA-seq data | 374 tumor + 50 normal | No |
| GSE76427 | Illumina HumanHT-12 V4.0 expression beadchip | RNA-seq data | 115 tumor | No |
| GSE14520 | Affymetrix HT Human Genome U133A Array | RNA-seq data | 242 tumor | No |
| GSE104580 | Affymetrix Human Genome U133 Plus 2.0 Array | RNA-seq data | 147 tumor | TACE |
| GSE109211 | Illumina HumanHT-12 WG-DASL V4.0 expression beadchip | RNA-seq data | 67 tumor | Sorafenib |
| GSE202069 | Illumina NovaSeq 6000 (Homo sapiens) | RNA-seq data | 17 tumor | anti-PD-1 |
| GSE140228 | Illumina HiSeq 4000 (Homo sapiens) | Single-cell RNA-seq data | 29791 cells | No |
| Guangxi cohort | Illumina NovaSeq6000 | RNA-seq data | 13 tumor + 13 normal | Camrelizumab + Apatinib |

**Table S2 Dendritic cell related genes in hepatocellular carcinoma datasets**

| **Green module of TCGA cohort (n=919)** | **Magenta module of GSE14520 (n=550)** | **Blue module of GSE76427 (n=1423)** | **DC-related genes (n=320)** |
| --- | --- | --- | --- |
| TAF10 | MSN | UBA7 | MSN |
| MSN | CAP1 | RHOA | WARS1 |
| WARS1 | WARS1 | KXD1 | STAT1 |
| GRN | S100A11 | OAZ1 | HLA-E |
| GSN | HK1 | MSN | HLA-DPB1 |
| HK1 | ARL6IP5 | WARS1 | AKR1B1 |
| NPC2 | ANXA5 | S100A11 | DAB2 |
| ARL6IP5 | PSME1 | CD63 | ARHGDIB |
| ANXA5 | CTSB | GSN | IFI30 |
| IQGAP1 | PSAP | NPC2 | CTSC |
| PSME1 | STAT1 | ARF3 | UBE2L6 |
| CTSB | HLA-E | GPX1 | CCND3 |
| STAT1 | TGM2 | TPP1 | LAPTM5 |
| PALLD | RCN1 | IQGAP1 | B2M |
| HLA-E | HLA-DPB1 | ACTB | PLTP |
| LGALS3BP | MBNL1 | RPS15 | CELF2 |
| CCND2 | YBX3 | GSTP1 | TAP1 |
| ANXA1 | AKR1B1 | PSAP | RGS2 |
| GNAI2 | RAB5B | STAT1 | ERBB3 |
| ATP6V1B2 | DAB2 | PALLD | TNFAIP2 |
| HLA-DPB1 | ARHGDIB | HLA-E | SPOCK2 |
| BTG2 | IFI30 | TAGLN2 | IRF1 |
| AKR1B1 | CTSC | HSBP1 | PSMB10 |
| DAB2 | CNN2 | MLF2 | WIPF1 |
| ARHGDIB | BST2 | CCND2 | ITM2A |
| CCN1 | TNC | GNAI2 | SLC1A3 |
| SH3BGRL | UBE2L6 | PLD3 | ITGB2 |
| LRP10 | CCND3 | SYNGR2 | SP100 |
| IFI30 | LAPTM5 | HLA-DPB1 | CTSS |
| ATP6AP2 | PSME2 | MBNL1 | ADGRE5 |
| JUNB | PRKAB1 | YBX3 | GYPC |
| CTSC | CAPG | SLC7A5 | C1QB |
| UBE2L6 | B2M | BTG2 | HCLS1 |
| MARCKS | ARPC1B | AKR1B1 | STAT5A |
| CCND3 | MYCBP2 | FDPS | CSF1R |
| LAPTM5 | LTF | DAB2 | RHOG |
| MTHFD2 | LANCL1 | ARHGDIB | RASSF2 |
| PSME2 | PLTP | SH3BGRL | LGALS9 |
| RNASE1 | MX1 | ADIPOR2 | F13A1 |
| LIPA | CTSL | CST3 | INPP5D |
| CAPG | CELF2 | PLEKHB2 | CRELD1 |
| B2M | TAP1 | LRP10 | CD53 |
| SMS | RAP1A | IFI30 | TNFRSF1B |
| PLTP | RGS2 | TALDO1 | LSP1 |
| CTSL | PLSCR1 | CTSC | SEMA4D |
| CELF2 | ERBB3 | LAMP1 | CD4 |
| MVP | PFKFB3 | DCTD | ADCY7 |
| GAS7 | MBD2 | TMX4 | SLA |
| ARL4C | TNFAIP2 | CNN2 | PIK3CD |
| TAP1 | PPP2R5D | IER3 | CHST2 |
| CSK | SPOCK2 | IFNGR2 | CYBB |
| BCKDHA | IRF1 | UBE2L6 | HLA-DMB |
| RGS2 | TNFAIP3 | CCND3 | NMI |
| PLSCR1 | PSMB10 | LAPTM5 | IRF8 |
| ERBB3 | WIPF1 | MTHFD2 | PLAAT4 |
| TNFAIP2 | IFNGR1 | RNASE1 | IL2RG |
| SPOCK2 | PRKACB | UBE3C | CD48 |
| IRF1 | ITM2A | RNF14 | ALOX5AP |
| SNRPD3 | GET1 | NET1 | CD37 |
| LEPROTL1 | SLC1A3 | PRKAB1 | RUNX3 |
| ICAM1 | ITGB2 | LIPA | GPSM3 |
| PSMB10 | CNPY2 | B2M | PIM2 |
| WIPF1 | SP100 | SLC25A36 | RGS10 |
| AXL | OAS1 | PKP4 | PLEKHO2 |
| PRORP | SDC3 | WDR82 | IFI44L |
| ITM2A | CTSS | ARPC1B | CD83 |
| SLC7A8 | ADGRE5 | MYCBP2 | SAMHD1 |
| NDUFA7 | GYPC | DELE1 | IRF4 |
| SLC1A3 | C1QB | PPP5C | SELL |
| ITGB2 | HCLS1 | EGFR | SLC7A7 |
| SP100 | STAT5A | TWF2 | CD52 |
| SDC3 | CSF1R | TJP1 | IRAG2 |
| CTSS | TRIM14 | LANCL1 | EVI2A |
| ADGRE5 | RHOG | EFNA1 | VSIG4 |
| ANK2 | RASSF2 | PLTP | DUSP2 |
| GYPC | B4GAT1 | MX1 | TRIM21 |
| C1QB | ST3GAL5 | TSPO | BTN3A3 |
| HCLS1 | LGALS9 | RALB | FOLR2 |
| STAT5A | IRF2 | CELF2 | FGL2 |
| CSF1R | F13A1 | MVP | PTPN7 |
| PTK2B | INPP5D | GAS7 | TYMP |
| RHOG | CAPN7 | VASP | ARHGAP25 |
| RASSF2 | CRELD1 | DES | LCK |
| S100A4 | DGKA | BRD8 | PTGER4 |
| FAM53B | CD53 | PARP4 | IL10RA |
| LGALS9 | KMT2B | TRIB1 | SASH3 |
| FCGBP | OTUD4 | TACC2 | RHOH |
| AP1S2 | CD68 | TAP1 | MNDA |
| F13A1 | TNFRSF1B | CSK | OAS2 |
| INPP5D | LSP1 | UBE2B | MX2 |
| CRELD1 | SEMA4D | FABP5 | IKZF1 |
| RPS6KA1 | CD4 | RGS2 | IL1B |
| DGKA | ERF | PPP3CB | CCR1 |
| ARRB2 | TRIM13 | ERBB3 | FPR1 |
| KCNAB2 | DHX16 | TENT4A | PTGS1 |
| NELL2 | PDE4B | AFG3L2 | NCF4 |
| CD53 | ADCY7 | TNFAIP2 | CSF2RB |
| ELF4 | SLA | DLG1 | ACAP1 |
| TNFRSF1B | PIK3CD | SPOCK2 | FCN1 |
| LSP1 | IRF9 | SMAD4 | CXCL13 |
| SEMA4D | CRCP | IRF1 | POU2AF1 |
| CD4 | CHST2 | TNKS | LCP2 |
| GTF2H4 | CYBB | SNRPD3 | IL2RB |
| ZEB2 | HLA-DMB | RANBP9 | SPI1 |
| FAIM2 | NMI | AK1 | GNA15 |
| FCHSD2 | GNB5 | LEPROTL1 | GPR183 |
| PRKAR2B | FCGR3B | IRF6 | CD3E |
| BCL2 | CELSR2 | GUSB | PLAU |
| PDE4B | IRF8 | APPBP2 | SIT1 |
| LLGL2 | PLAAT4 | RNF103 | GZMA |
| TBCE | CCL4 | ICAM1 | BTK |
| ITPKB | IL2RG | TNFAIP3 | CR2 |
| EMP3 | CD48 | SERTAD2 | RASGRP1 |
| ADCY7 | ALOX5AP | PEX11B | AOAH |
| SLA | CD37 | PSMB10 | LY75 |
| BCL7A | RUNX3 | WIPF1 | HLA-DOB |
| HBEGF | SLC31A2 | AXL | CD38 |
| IL32 | GPSM3 | IFNGR1 | ITGAM |
| C17orf75 | PIM2 | PIK3R3 | IL7R |
| PIK3CD | RGS10 | ITM2A | TRAF3IP3 |
| CXADR | RGS19 | GET1 | CD2 |
| CHST2 | IFI6 | SLC7A8 | JAK2 |
| CYBB | PLEKHO2 | MAPKAPK3 | LY86 |
| HLA-DMB | IFI44L | SLC1A3 | PNOC |
| NMI | CD83 | ITGB2 | HK3 |
| FUT8 | LZTS3 | AGT | BATF |
| DUSP4 | PLA2G15 | SP100 | CD84 |
| TCN2 | CXCL1 | OAS1 | IL15 |
| PLCB2 | SAMHD1 | UNC13B | STAT4 |
| IRF8 | IRF4 | CTSS | ADAMDEC1 |
| PLAAT4 | SELL | ADGRE5 | CD27 |
| CCL4 | SLC7A7 | ANK2 | ADORA3 |
| IL2RG | CD52 | GYPC | VAV1 |
| CD48 | IRAG2 | C1QB | CCR7 |
| MFNG | ISG20 | HCLS1 | CFP |
| IMPDH1 | IFIT3 | GSTA4 | RARRES1 |
| ALOX5AP | EVI2A | RHOBTB3 | CD19 |
| CD37 | VSIG4 | STAT5A | IGSF6 |
| RUNX3 | FMNL1 | RABGAP1L | LAG3 |
| FLI1 | DUSP2 | NINJ1 | AIM2 |
| GPSM3 | TRIM21 | BCAS2 | GFI1 |
| PIM2 | BTN3A3 | SMAD2 | TNFRSF17 |
| PMAIP1 | FOLR2 | CTNNBIP1 | GZMK |
| RGS10 | FGL2 | CDYL | CD5L |
| RGS19 | TCFL5 | CSF1R | CLEC10A |
| CAMK1 | PTPN7 | PTK2B | PTPN6 |
| KCNN4 | TYMP | PAN2 | CD96 |
| ARHGAP4 | ARHGAP25 | CFDP1 | CD3G |
| PLEKHO2 | LCK | RHOG | ST8SIA4 |
| MRC1 | ZFYVE9 | RASSF2 | CCR2 |
| IFI44L | PTGER4 | S100A4 | IL18RAP |
| CD83 | IL10RA | B4GAT1 | ADGRE1 |
| ALOX5 | SASH3 | MTRR | CD209 |
| OSTF1 | TLR2 | FAM53B | LTB |
| PDE4D | RHOH | ST3GAL5 | SH2D2A |
| SAMHD1 | MNDA | CLK2 | IL15RA |
| MYO5A | SHROOM2 | UPP1 | LAIR2 |
| TOX | OAS2 | LGALS9 | SYK |
| IRF4 | MX2 | TLN1 | ADGRE2 |
| SELL | IKZF1 | FBXO11 | LILRB2 |
| MMP19 | IL1B | DRAP1 | LAX1 |
| SLC7A7 | CCR1 | ARHGEF9 | SP140 |
| PKIA | FPR1 | AP1S2 | CD8B |
| RPS6KA4 | PTGS1 | DMTF1 | HCK |
| CD52 | NCF4 | F13A1 | VOPP1 |
| IRAG2 | CSF2RB | SNRPE | CPVL |
| TAP2 | CAPN5 | SH2B3 | TNFAIP8 |
| EVI2A | ACAP1 | INPP5D | P2RY6 |
| THBS4 | FCN1 | DHX8 | HLA-C |
| MAL | CXCL13 | PHYH | TAPBP |
| VSIG4 | INHBB | CRELD1 | LCP1 |
| FMNL1 | POU2AF1 | CD53 | HLA-DRA |
| DUSP2 | LCP2 | MFAP2 | IFI16 |
| TRIM21 | IL2RB | VPS16 | UCP2 |
| BTN3A3 | BTN2A2 | CD68 | PSMB8 |
| FOLR2 | SPI1 | TNFRSF1B | CORO1A |
| FGL2 | SLC15A2 | LSP1 | TSPAN4 |
| TCFL5 | GNA15 | APC | CASP4 |
| PTPN7 | DAG1 | SEMA4D | IFI35 |
| TYMP | GPR183 | PRPSAP2 | ARHGEF6 |
| ARHGAP25 | CD3E | CD4 | RGL1 |
| LCK | PLAU | LPL | GATA3 |
| PTGER4 | SIT1 | AOC1 | CYTIP |
| IL10RA | GZMA | FEZ1 | CD74 |
| SASH3 | BTK | TRIM38 | PRKCB |
| TLR2 | CR2 | LOXL1 | SERPINB9 |
| ICAM3 | LAMP3 | GTF2H4 | CLEC2B |
| RHOH | C1QL1 | ZEB2 | SP110 |
| MNDA | RASGRP1 | FCHSD2 | BTN3A1 |
| OAS2 | AOAH | ZFYVE16 | CD69 |
| RAB3A | LY75 | FAN1 | IL16 |
| MX2 | HLA-DOB | ITPR1 | RIPOR2 |
| IKZF1 | BCL2A1 | PUM3 | BTN3A2 |
| CD79A | CD38 | ITPKB | SELPLG |
| IL1B | ANKRD26 | EMP3 | C3AR1 |
| CRIP1 | ITGB7 | ZKSCAN5 | CD300A |
| PLEKHA6 | ITGAM | ADCY7 | IDO1 |
| CCR1 | IL7R | SLA | CD247 |
| FPR1 | TRAF3IP3 | GCA | PRKCQ |
| PTGS1 | CD2 | MTR | CST7 |
| NCF4 | JAK2 | BCL7A | LILRB4 |
| CSF2RB | LY86 | VSNL1 | CXCL11 |
| ERCC8 | PNOC | FANCA | GZMB |
| ADAM8 | HK3 | DNAJB4 | ITGAX |
| IL6 | BATF | TNK2 | GPR18 |
| ACAP1 | CD84 | PIK3CD | GZMH |
| STK17B | IL15 | IRF9 | IFNG |
| FCN1 | STAT4 | CXADR | MS4A1 |
| CXCL13 | XAF1 | PCDH1 | ICOS |
| EGR2 | ADAMDEC1 | CHST2 | CMKLR1 |
| LIF | CD27 | CYBB | LYN |
| POU2AF1 | ADORA3 | NFKBIE | THEMIS2 |
| LCP2 | CD180 | HLA-DMB | CD86 |
| IL2RB | VAV1 | VASH1 | SH2D1A |
| BTN2A2 | CXCL6 | NMI | ITK |
| SPI1 | CCR7 | CEBPD | CASP1 |
| S100A1 | XCL1 | ABCD4 | HOPX |
| PVALB | CFP | ZNF212 | HLA-DQB1 |
| GNA15 | RARRES1 | FUT8 | PTAFR |
| INPP4B | CD19 | PURA | EVI2B |
| ANK1 | IGSF6 | CELSR2 | FYB1 |
| GPR183 | LAG3 | CEBPA | PLAUR |
| CD3E | AIM2 | TCN2 | HLA-DPA1 |
| PLAU | GFI1 | PLCB2 | FNBP1 |
| SIT1 | P2RY14 | PHACTR2 | PTPRC |
| RYR1 | TNFRSF17 | IRF8 | PPP1R16B |
| GZMA | GZMK | PRKX | PIP4K2A |
| BTK | CD5L | MEIS1 | ARHGAP45 |
| GCNT1 | CLEC10A | PLAAT4 | ATP8A1 |
| SCN1B | PTPN6 | IL2RG | DOCK2 |
| CR2 | TFEC | CD48 | TRIM22 |
| LAMP3 | CD96 | LIG3 | SOCS1 |
| HRH1 | CD3G | HSD11B2 | CLIC2 |
| ETV6 | CRTAM | FRG1 | ITGA4 |
| RASGRP1 | ST8SIA4 | MFNG | ITGAL |
| TRAF1 | SCN9A | TCIRG1 | CD3D |
| AOAH | CCR2 | SBNO2 | RNASE6 |
| PPP2R2B | FLT3LG | ALOX5AP | MYO1F |
| RAD52 | CCR5 | RARG | NKG7 |
| HDAC9 | IL18RAP | CD37 | CD6 |
| LY75 | POU3F2 | RUNX3 | IFITM1 |
| HLA-DOB | ADGRE1 | PTPN13 | CCL8 |
| BCL2A1 | KCNA3 | GULP1 | DOK2 |
| CD38 | CD209 | FLI1 | NCF1 |
| TRPM2 | LTB | GPSM3 | GLIPR1 |
| GFRA2 | SH2D2A | PIM2 | MAP4K1 |
| OSMR | IL15RA | SKI | CTSW |
| FABP3 | RHBDL1 | CD151 | IFI44 |
| STAC | TFDP3 | ATP1B2 | GPR65 |
| ITGAM | GP1BA | RGS10 | KLRB1 |
| IL7R | GUCA2B | TMC6 | FPR3 |
| TRAF3IP3 | LAIR2 | ABCA3 | LST1 |
| MARCO | TNFRSF9 | RASSF1 | P2RY10 |
| CD2 | SYK | TRAF5 | PRF1 |
| JAK2 | ADGRE2 | LIMK1 | IPCEF1 |
| LY86 | CBFA2T2 | EIF1AY | MSR1 |
| SPIB | GPR171 | NEFH | AIF1 |
| PNOC | LILRB2 | HBG2 | HLA-A |
| SLC6A6 | LAX1 | FGF2 | APOBEC3G |
| VNN2 | SP140 | LMO3 | FGD2 |
| IL27RA | HUWE1 | ARHGAP4 | CD72 |
| ZNF443 | DHPS | PLEKHO2 | LPXN |
| GPA33 | TMEM8B | IFI44L | TMSB4X |
| HK3 | CD8B | CD83 | PYHIN1 |
| BATF | AMPD3 | ALOX5 | RGS1 |
| CD1C | HCK | PLA2G15 | CXCR4 |
| CD84 | CBFA2T3 | OSTF1 | PRDM1 |
| IL15 | VOPP1 | ADCY9 | HLA-DMA |
| S100A3 | CPVL | AGTPBP1 | MILR1 |
| RAB33A | CHIT1 | SAMHD1 | NCKAP1L |
| SPN | ADAM28 | TBC1D8 | EVL |
| PTPN22 | TNFAIP8 | MYO5A | PLEKHO1 |
| EGR3 | PTPRH | TOX | NAGK |
| STAT4 | P2RY6 | RAPGEF1 | C1QA |
| CD33 | IRF7 | HPS5 | MICAL1 |
| AMPD1 | LGALS2 | RAB40B | GTF2IRD1 |
| ADAMDEC1 | HLA-C | IKBKE | LPAR6 |
| CD27 | TAPBP | PPP1R3D | PRKCH |
| AGAP2 | LCP1 | LSM7 | MCUB |
| ADORA3 | H1-0 | IRF4 | ARHGAP15 |
| SLAMF1 | HLA-DRA | SELL | GMIP |
| CRYBB1 | IFI16 | ABCG1 | PLAC8 |
| HOXC4 | UCP2 | PPIP5K1 | SLAMF7 |
| CD180 | PSMB8 | BSN | CYTH4 |
| WNT10B | CORO1A | SLC7A7 | GIMAP4 |
| PLA2G7 | ADCY6 | UBOX5 | DOCK10 |
| VAV1 | TSPAN4 | SERPINB2 | TRPV2 |
| RASA3 | CASP4 | ITGB3 | ADAP2 |
| ZNF507 | MAF | RPS6KA4 | SLAMF8 |
| MATK | IFI35 | ADA | DPEP2 |
| IL18 | WDR18 | CD52 | BCL11B |
| ARHGAP22 | MKNK1 | IRAG2 | SLC15A3 |
| SPINK2 | ARHGEF6 | ISG20 | MS4A4A |
| CCR7 | APOL1 | MAPK4 | MS4A6A |
| SOCS3 | RGL1 | DNAJC6 | GIMAP6 |
| XCL1 | GATA3 | IFIT3 | SIGLEC5 |
| PIK3CG | CYTIP | MAP2K5 | P2RY13 |
| CFP | CD74 | TAP2 | C5AR1 |
| RARRES1 | PRKCB | EVI2A | TLR7 |
| MYBPC2 | SERPINB9 | MAL | CARD9 |
| CD19 | CLEC2B | IFNAR2 | CD244 |
| IGSF6 | SP110 | VSIG4 | SAMSN1 |
| S1PR4 | ADAM19 | DUSP2 | SIRPG |
| EPYC | BTN3A1 | TRIM21 | NECAP2 |
| PDE1B | CD69 | BTN3A3 | UTS2 |
| CD5 | IL16 | FOLR2 | DENND2D |
| LAG3 | RIPOR2 | FGL2 | APOL3 |
| CD70 | BTN3A2 | POP5 | FCRL2 |
| AIM2 | SELPLG | EEA1 | MZB1 |
| SIGLEC6 | C3AR1 | PTPN7 | FCMR |
| IL24 | CD300A | TYMP | CLEC7A |
| CNR2 | NFKBIL1 | NAIP | PTPRE |
| GFI1 | PCGF1 | ARHGAP25 | HLA-F |
| RENBP | IDO1 | LCK | PILRA |
| PTGER2 | CD247 | ZFYVE9 | CCL18 |
| CHRNB2 | PRKCQ | PTGER4 | GNLY |
| TNFRSF17 | NLRP1 | BCL3 | STAB1 |
| ZNF571 | CST7 | IL10RA | WAS |
| GZMK | LILRB4 | SASH3 | STK10 |
| FLT3 | CXCL11 | TNFRSF11B | SIGLEC1 |
| CD5L | GZMB | RHOH |  |
| CLEC10A | TLR1 | MNDA |  |
| PTPN6 | ITGAX | OAS2 |  |
| KCNJ10 | GPR18 | GJB1 |  |
| GRTP1 | TNFSF13 | TRAPPC6A |  |
| TFEC | GZMH | ITIH2 |  |
| HPGDS | IFNG | MX2 |  |
| TNFRSF8 | MS4A1 | VWA5A |  |
| CD1B | ICOS | IKZF1 |  |
| FCER2 | BIRC3 | CD79A |  |
| CD96 | LAIR1 | ENPP1 |  |
| CD3G | CMKLR1 | IL1B |  |
| SEMA3A | LYN | ARHGAP26 |  |
| ADD2 | THEMIS2 | PLEKHA6 |  |
| L3MBTL1 | CD86 | PEX12 |  |
| SLC4A10 | PML | SLC26A2 |  |
| LILRB5 | CASK | CCR1 |  |
| IL12RB1 | SH2D1A | MAN2A1 |  |
| ZNF253 | LILRB1 | FPR1 |  |
| CRTAM | ITK | PTGS1 |  |
| ST8SIA4 | CASP1 | FPGT |  |
| LTA | CCRL2 | NCF4 |  |
| CCR2 | HLA-G | CSF2RB |  |
| CCR6 | HOPX | ADAM8 |  |
| CCR5 | HLA-DQB1 | SPINK5 |  |
| SLC4A8 | PTAFR | GLI3 |  |
| AOC2 | MDFIC | ACAP1 |  |
| IL18RAP | EVI2B | STK17B |  |
| NLRP3 | FYB1 | HCAR3 |  |
| ADGRE1 | PLAUR | DEPDC5 |  |
| TNF | HLA-DPA1 | EPM2A |  |
| ZNF225 | TRPC4AP | FCN1 |  |
| CD101 | TM9SF4 | SCO2 |  |
| CD80 | FNBP1 | CXCL13 |  |
| JAK3 | SEL1L3 | EGR2 |  |
| CEACAM4 | POFUT1 | ZBTB39 |  |
| TNFSF8 | FEM1B | INHBB |  |
| ZNF345 | NEDD4L | POU2AF1 |  |
| KCNA3 | PTPRC | LCP2 |  |
| CD300C | STX10 | CDK20 |  |
| ZNF80 | ZNF3 | IL2RB |  |
| CD209 | GM2A | CD79B |  |
| KIR3DL2 | PPP1R16B | SPI1 |  |
| CD226 | PIP4K2A | GNA15 |  |
| LTB | TPT1 | USP13 |  |
| SH2D2A | ARHGAP45 | SH2B2 |  |
| IL15RA | DNAJC16 | SLN |  |
| VENTX | TBC1D9 | INPP4B |  |
| RHBDL1 | ZC3HAV1 | PDZK1 |  |
| BTN1A1 | ATP8A1 | GPR183 |  |
| IL10 | DOCK2 | AP1B1 |  |
| SNUPN | COG7 | PTPN21 |  |
| TLR6 | TRANK1 | NPY1R |  |
| GZMM | TRIM22 | MAP3K12 |  |
| CASP5 | SOCS1 | PHKA1 |  |
| LAIR2 | CLIC2 | MST1R |  |
| TNFRSF9 | ITGA4 | CD3E |  |
| SYK | SATB2 | PLAU |  |
| MSL3 | ITGAL | SIT1 |  |
| EFCAB2 | CLCN2 | GZMA |  |
| ABCD2 | CD3D | SRPX2 |  |
| ASCL2 | RNASE6 | BTK |  |
| ADGRE2 | ARAP2 | GCNT1 |  |
| PDCD1 | MYO1F | AVIL |  |
| TNFRSF13B | RSAD2 | CR2 |  |
| GPR171 | CD47 | RASGRP1 |  |
| TBX6 | NKG7 | TRAF1 |  |
| LILRB2 | ABHD5 | LRP6 |  |
| KLRC3 | FAM169A | TNFSF12 |  |
| LAX1 | CD6 | CPA3 |  |
| ZFP2 | IFITM1 | AOAH |  |
| S100A5 | ZAP70 | RAD52 |  |
| CACNB2 | CCL8 | CTSG |  |
| SP140 | DOK2 | OASL |  |
| CD160 | NCF1 | LY75 |  |
| IL2 | GLIPR1 | HLA-DOB |  |
| CCL22 | TNFRSF4 | AP3B2 |  |
| ADPRH | MAP4K1 | CD38 |  |
| MMP25 | CTSW | TNNT3 |  |
| CD40LG | IFI44 | ANKRD26 |  |
| CCL17 | GPR65 | ITGB7 |  |
| IL12B | KLRB1 | GFRA2 |  |
| HTR7 | FPR3 | STAC |  |
| CD8B | LST1 | FGF7 |  |
| AMPD3 | P2RY10 | ITGAM |  |
| HCK | PRF1 | IL7R |  |
| MYBPC3 | IPCEF1 | TRAF3IP3 |  |
| CEACAM3 | TET3 | CD2 |  |
| CCL7 | MSR1 | JAK2 |  |
| ZBP1 | SP140L | CDK5R2 |  |
| VOPP1 | AIF1 | TULP3 |  |
| CYRIA | FBXL18 | LY86 |  |
| SEMA6C | HLA-A | SPIB |  |
| EHD1 | APOBEC3G | PRSS1 |  |
| DRC3 | FGD2 | PIGL |  |
| CPVL | CD72 | RET |  |
| IL9R | LPXN | CX3CR1 |  |
| CHIT1 | TMSB4X | PNOC |  |
| KIR2DL3 | PYHIN1 | HBE1 |  |
| DRD4 | RGS1 | IL27RA |  |
| MEFV | CXCR4 | HK3 |  |
| ADAM28 | TRAT1 | IL6R |  |
| TNFAIP8 | PRDM1 | KCNK3 |  |
| P2RX3 | HLA-DMA | MMP13 |  |
| SLC12A3 | MILR1 | BATF |  |
| P2RY6 | NCKAP1L | EPHA1 |  |
| CCR4 | TMSB10 | CLCNKB |  |
| RAD50 | ARPC4 | CD1C |  |
| KCNJ5 | EVL | CD84 |  |
| GRAP2 | TNS3 | PRRX1 |  |
| LGALS2 | EPS15 | IL15 |  |
| SCNN1D | LAP3 | S100A3 |  |
| CR1 | UQCC1 | ANKRD1 |  |
| GPR15 | SQOR | DSC3 |  |
| H2BC6 | ARHGAP17 | REL |  |
| GPR31 | ARFGEF2 | KYAT1 |  |
| KCNA2 | MFSD1 | RAB33A |  |
| WNT1 | PLEKHO1 | PTPN22 |  |
| CD1E | NAGK | ISL1 |  |
| GPR39 | C1QA | STAT4 |  |
| NTRK1 | CAMK2N1 | CD33 |  |
| HLA-C | CDK5RAP1 | AMPD1 |  |
| TAPBP | MICAL1 | XAF1 |  |
| LCP1 | VPS13C | ADAMDEC1 |  |
| HLA-DRA | GTF2IRD1 | CD27 |  |
| IFI16 | ALG12 | GJB5 |  |
| UCP2 | NFS1 | ADORA3 |  |
| PSMB8 | TMEM33 | BMP6 |  |
| CORO1A | PARP12 | SLAMF1 |  |
| TSPAN4 | MAFB | CRYBB1 |  |
| CASP4 | CHMP4A | ANXA11 |  |
| MAX | LPAR6 | WNT10B |  |
| MAF | HECA | PLA2G7 |  |
| IFI35 | DRAM1 | VAV1 |  |
| DUSP5 | PDGFC | RASA3 |  |
| ENTPD1 | PRKCH | ZNF507 |  |
| RBM4B | SMC6 | LIG4 |  |
| ARHGEF6 | NT5DC3 | PRKCE |  |
| APOL1 | KATNBL1 | MAP3K13 |  |
| RGL1 | MCUB | MATK |  |
| APOBEC3C | TPRA1 | NPHP1 |  |
| GATA3 | ARHGAP15 | ARHGAP22 |  |
| CYTIP | GMIP | CCR7 |  |
| CD74 | TTC17 | CARTPT |  |
| PRKCB | DDX60 | MAP3K10 |  |
| S100B | PLAC8 | REN |  |
| CSF1 | PARP8 | PIK3CG |  |
| SERPINB9 | PIGN | CFP |  |
| CLEC2B | SLAMF7 | PDE3A |  |
| SP110 | CYTH4 | RARRES1 |  |
| ADAM19 | BIN2 | CD19 |  |
| BTN3A1 | IFIH1 | NPFF |  |
| PADI2 | GIMAP4 | IGSF6 |  |
| CD69 | DOCK10 | TRPC3 |  |
| IL16 | BRWD1 | MLANA |  |
| RIPOR2 | TRPV2 | S1PR4 |  |
| BTN3A2 | HERC6 | RORB |  |
| SELPLG | ADAP2 | PDE1B |  |
| C3AR1 | IFT81 | PRMT1 |  |
| MSC | SLAMF8 | MBTPS2 |  |
| CD300A | DPEP2 | LTC4S |  |
| TADA2A | C1orf54 | PTK6 |  |
| KCNMB1 | BCL11B | CD5 |  |
| NCF2 | ZNF267 | LAG3 |  |
| VILL | BMP2K | FHIT |  |
| TCL1A | EAF2 | CD70 |  |
| IDO1 | SLC15A3 | AIM2 |  |
| CD247 | MS4A4A | DPF1 |  |
| PRKCQ | ARHGEF28 | INSL4 |  |
| LYL1 | ACTR5 | CDKL5 |  |
| PDE6G | LSM14B | KRBOX4 |  |
| ST8SIA1 | KLF3 | GFI1 |  |
| FYN | MS4A6A | SLC2A4 |  |
| NLRP1 | TREM2 | RPGRIP1 |  |
| CST7 | SETD6 | PTGER2 |  |
| PLA2G4A | CBX8 | HTN1 |  |
| LILRB4 | ERAP2 | TNFRSF17 |  |
| CXCL11 | GIMAP6 | GZMK |  |
| GZMB | MEPCE | AQP2 |  |
| ITGAX | PVRIG | FLT3 |  |
| HSPA1L | HERC5 | KRT31 |  |
| STX11 | CRNKL1 | CD5L |  |
| RTN1 | SIGLEC5 | CLEC10A |  |
| ST20 | P2RY13 | ATF7 |  |
| RGS13 | IL22RA1 | PTPN6 |  |
| GPR18 | PLEKHG6 | CLCN5 |  |
| KLRG1 | C5AR1 | TULP1 |  |
| PDE6B | NXF3 | LPAR2 |  |
| LILRA4 | TLR7 | TNFRSF8 |  |
| GZMH | CARD9 | CD1B |  |
| CD1A | LRRC8E | FCER2 |  |
| CAMK4 | BMP8A | CD96 |  |
| IFNG | FBXO17 | ERBB4 |  |
| MS4A1 | CD244 | CD3G |  |
| P2RX1 | SAMSN1 | DGKI |  |
| FLRT1 | PLA2G2D | CTF1 |  |
| ICOS | SIRPG | TXK |  |
| BIRC3 | FAR2 | SLC4A10 |  |
| SIGLEC9 | FOXRED2 | HBD |  |
| LIMK2 | NECAP2 | SLC6A3 |  |
| KLRD1 | UTS2 | LILRB5 |  |
| LAIR1 | DENND1C | CHAD |  |
| CMKLR1 | DENND2D | IL12RB1 |  |
| LILRA1 | APOL3 | ZNF253 |  |
| IL5RA | NPL | MATN1 |  |
| ONECUT1 | FCRL2 | ST8SIA4 |  |
| LYN | SH3BGRL3 | PPFIA2 |  |
| NCR3 | MZB1 | LTA |  |
| FPR2 | PSPN | CCR2 |  |
| THEMIS2 | CUTA | FLT3LG |  |
| FASLG | FCMR | RAB27B |  |
| FCGR2B | ACOT9 | GRIN2D |  |
| CD86 | APOL2 | ZFP37 |  |
| CIITA | PYCARD | IL18RAP |  |
| BLK | CLEC7A | NLRP3 |  |
| PML | WASF2 | POU2F3 |  |
| ZNF493 | PHF11 | ADGRE1 |  |
| LILRA2 | PTPRE | TNF |  |
| DOK1 | HLA-F | ZNF225 |  |
| HLA-DOA | PILRA | ALPK1 |  |
| PSTPIP1 | CCL18 | ATP4A |  |
| SH2D1A | AGPAT1 | GLMN |  |
| KIR2DL4 | CUL7 | CD80 |  |
| GPR68 | GNLY | PTGFR |  |
| PTCRA | STAB1 | DNASE1L2 |  |
| IL2RA | PLXND1 | RFPL2 |  |
| CSF2RA | WAS | MITF |  |
| LILRB1 | FOXA2 | LHCGR |  |
| ITK | STK10 | FEV |  |
| CASP1 | SIGLEC1 | CD300C |  |
| PSEN2 |  | CD209 |  |
| CCRL2 |  | ZNF343 |  |
| CXCR6 |  | PHKG1 |  |
| RPS17 |  | KIR3DL2 |  |
| HOPX |  | CD226 |  |
| PTPRO |  | LTB |  |
| HLA-DQB1 |  | SH2D2A |  |
| POU2F2 |  | BRS3 |  |
| PTAFR |  | ENTPD2 |  |
| MDFIC |  | IL15RA |  |
| CADM3 |  | VENTX |  |
| EVI2B |  | TREH |  |
| ZKSCAN3 |  | PTGES |  |
| EPB41L3 |  | PIP5K1A |  |
| FYB1 |  | HCRTR2 |  |
| SLC8A1 |  | IRS4 |  |
| FCAR |  | SCN5A |  |
| CD28 |  | GZMM |  |
| PLAUR |  | MS4A2 |  |
| SMARCE1 |  | LAIR2 |  |
| HLA-DPA1 |  | CCL1 |  |
| SZRD1 |  | SYK |  |
| PLEKHM2 |  | MAGEB3 |  |
| KCTD12 |  | SLC4A7 |  |
| FNBP1 |  | ASCL2 |  |
| SEL1L3 |  | ADGRE2 |  |
| LSM12 |  | BCS1L |  |
| PTPRC |  | HCRTR1 |  |
| GM2A |  | PDCD1 |  |
| PPP1R16B |  | TNFRSF13B |  |
| TLE3 |  | KRT37 |  |
| ZBTB18 |  | LILRB2 |  |
| PIP4K2A |  | CRYGB |  |
| ARHGAP45 |  | KLRC3 |  |
| DENND3 |  | LAX1 |  |
| MAPK8IP1 |  | ZFP2 |  |
| ATP2A3 |  | SLC5A2 |  |
| CHI3L2 |  | SP140 |  |
| PRKCA |  | CYP2R1 |  |
| TMCC2 |  | KRT12 |  |
| ATP8A1 |  | CD160 |  |
| DOCK2 |  | SNCB |  |
| TAF6L |  | CCL22 |  |
| SIK2 |  | SCN7A |  |
| ZNF248 |  | CALCR |  |
| TRIM22 |  | MMP25 |  |
| CYLD |  | CD40LG |  |
| SOCS1 |  | CCL17 |  |
| CDHR1 |  | IL12B |  |
| MLC1 |  | TGM5 |  |
| CLIC2 |  | CCL27 |  |
| ITGA4 |  | CD8B |  |
| SATB2 |  | GNRH1 |  |
| FAM149B1 |  | NTN1 |  |
| ITGAL |  | HCK |  |
| NSG1 |  | ZNF157 |  |
| CD3D |  | GRIA3 |  |
| RNASE6 |  | H4C1 |  |
| FCHO1 |  | CCL7 |  |
| C12orf29 |  | ZNF442 |  |
| ASAH1 |  | ZBP1 |  |
| MYO1F |  | VOPP1 |  |
| TCHH |  | COL21A1 |  |
| PYROXD1 |  | EHD1 |  |
| NKG7 |  | GAST |  |
| RAP2B |  | CPVL |  |
| CD6 |  | FAT2 |  |
| IFITM1 |  | KIR2DL3 |  |
| ZAP70 |  | TACR3 |  |
| CCL8 |  | DRD4 |  |
| CD7 |  | AMELY |  |
| DOK2 |  | MEFV |  |
| NCF1 |  | TNFAIP8 |  |
| GLIPR1 |  | TECR |  |
| EFCAB11 |  | P2RY6 |  |
| MAP4K1 |  | GRAP2 |  |
| RASGRP2 |  | PPEF2 |  |
| BCAT1 |  | SPTB |  |
| ATP1A3 |  | IRF7 |  |
| ETS1 |  | GRM2 |  |
| CTSW |  | H2BC14 |  |
| IFI44 |  | GNRH2 |  |
| GPR65 |  | IFNA6 |  |
| KLRB1 |  | MC5R |  |
| RLN2 |  | H3-4 |  |
| CEBPE |  | TRPC7 |  |
| FPR3 |  | CD1E |  |
| INSL3 |  | ACTN1 |  |
| LST1 |  | CCT5 |  |
| KRT36 |  | ATP6V1G1 |  |
| P2RY10 |  | FLOT1 |  |
| PRF1 |  | MAP1LC3B |  |
| CLDN9 |  | HLA-C |  |
| OSM |  | RAB8A |  |
| HOXA1 |  | TAPBP |  |
| IPCEF1 |  | ATXN10 |  |
| MSR1 |  | ATP1B3 |  |
| MYO9B |  | PTPA |  |
| SP140L |  | PAK2 |  |
| LRP5L |  | IDI1 |  |
| CEACAM21 |  | LCP1 |  |
| APOBEC3F |  | HLA-DRA |  |
| SCAI |  | CNP |  |
| AIF1 |  | IFI16 |  |
| ZNF749 |  | STAT3 |  |
| PGAP2 |  | UCP2 |  |
| ZNF529 |  | PSMB8 |  |
| ZNF674 |  | RALGDS |  |
| HLA-A |  | CDC5L |  |
| TSHR |  | PAIP1 |  |
| PLK3 |  | CORO1A |  |
| HLA-DQB2 |  | CLNS1A |  |
| APOBEC3G |  | MAN2B1 |  |
| FGD2 |  | PIM1 |  |
| ZYX |  | NFKB1 |  |
| MYH7B |  | NR2F6 |  |
| LILRA5 |  | TSPAN4 |  |
| PTGDR |  | PPM1B |  |
| CD72 |  | SWAP70 |  |
| LY9 |  | CASP4 |  |
| ZNF721 |  | TNFRSF14 |  |
| NEU3 |  | BAD |  |
| LPXN |  | TM4SF1 |  |
| CYSLTR1 |  | HLCS |  |
| SIGLEC8 |  | GRB10 |  |
| ZNF10 |  | IFI35 |  |
| TMSB4X |  | OSGEP |  |
| KLK1 |  | SLC9A1 |  |
| CCL13 |  | ENTPD1 |  |
| CXCR5 |  | EXTL2 |  |
| PYHIN1 |  | ZNF32 |  |
| RGS1 |  | ARHGEF6 |  |
| FCGR1A |  | RGL1 |  |
| CXCR4 |  | PCYT2 |  |
| NCR1 |  | APOBEC3C |  |
| CXCR3 |  | GATA3 |  |
| TRAT1 |  | CYTIP |  |
| SIGLEC7 |  | CD74 |  |
| PRDM1 |  | PDLIM3 |  |
| SIRPB1 |  | PIGH |  |
| B3GALT2 |  | SOCS5 |  |
| HLA-DMA |  | CETN3 |  |
| MILR1 |  | RIN2 |  |
| NXPE3 |  | PRKCB |  |
| NCKAP1L |  | CCHCR1 |  |
| TRPA1 |  | SERPINB9 |  |
| ZNF573 |  | CLEC2B |  |
| PLEKHA2 |  | MAGI2 |  |
| FUT7 |  | SCAPER |  |
| RAB31 |  | SP110 |  |
| EVL |  | MGAT3 |  |
| LAP3 |  | BTN3A1 |  |
| NIBAN1 |  | PADI2 |  |
| EFHD2 |  | CD69 |  |
| ARHGAP17 |  | IL16 |  |
| FXYD5 |  | RIPOR2 |  |
| COQ8A |  | LRRN3 |  |
| PLEKHO1 |  | BTN3A2 |  |
| NAGK |  | CDC42EP2 |  |
| C1QA |  | SELPLG |  |
| MICAL1 |  | LAT |  |
| GTF2IRD1 |  | ITSN2 |  |
| CDCP1 |  | C3AR1 |  |
| PLBD1 |  | MSC |  |
| SLC2A4RG |  | CD300A |  |
| DHX35 |  | NCF2 |  |
| LPAR6 |  | VILL |  |
| REC8 |  | NCAM1 |  |
| LIMD2 |  | SHMT1 |  |
| SMO |  | KDM4C |  |
| ZXDC |  | TCL1A |  |
| ATG7 |  | IDO1 |  |
| FANCF |  | CD247 |  |
| SARS2 |  | PRKCQ |  |
| ODR4 |  | LYL1 |  |
| CDK5RAP3 |  | PDE6G |  |
| PRKCH |  | ST8SIA1 |  |
| MCUB |  | PARD3 |  |
| ARHGAP15 |  | INVS |  |
| GMIP |  | CST7 |  |
| PLEKHA4 |  | PLA2G4A |  |
| PLAC8 |  | LILRB4 |  |
| PARP8 |  | NFATC1 |  |
| CEP70 |  | CXCL11 |  |
| SLAMF7 |  | GZMB |  |
| CYTH4 |  | TLR1 |  |
| BIN2 |  | ITGAX |  |
| FASTKD3 |  | STX11 |  |
| RHBDF2 |  | B3GALT4 |  |
| RAB8B |  | RTN1 |  |
| GIMAP4 |  | CSF2 |  |
| MRPL46 |  | CAMP |  |
| SEMA4A |  | GPR18 |  |
| DOCK10 |  | KLRG1 |  |
| TRPV2 |  | GZMH |  |
| DAPP1 |  | CD1A |  |
| CEP76 |  | CAMK4 |  |
| IL18BP |  | IFNG |  |
| NABP1 |  | MS4A1 |  |
| ADAP2 |  | SLC24A1 |  |
| SLAMF8 |  | ICOS |  |
| NEIL1 |  | KCNJ6 |  |
| HPSE |  | ADH7 |  |
| RAB38 |  | VEGFA |  |
| TTC33 |  | CCL23 |  |
| EBI3 |  | SIGLEC9 |  |
| TREM1 |  | SAT1 |  |
| LRRK1 |  | KLRD1 |  |
| DPEP2 |  | MOGS |  |
| RUBCNL |  | CMKLR1 |  |
| BCL11B |  | NECAB3 |  |
| WDR5B |  | ONECUT1 |  |
| ZNF267 |  | LYN |  |
| LIME1 |  | NCR3 |  |
| NRIP3 |  | FPR2 |  |
| MARCHF1 |  | THEMIS2 |  |
| RAB3IL1 |  | ATM |  |
| OGFRL1 |  | FASLG |  |
| SLC15A3 |  | CD86 |  |
| THAP10 |  | TXNDC16 |  |
| MS4A4A |  | CIITA |  |
| RAB20 |  | BLK |  |
| TRPV1 |  | AP4S1 |  |
| CHST11 |  | PFKM |  |
| DET1 |  | HSF4 |  |
| CEP83 |  | LILRA2 |  |
| MS4A6A |  | HLA-DOA |  |
| BANK1 |  | PDE10A |  |
| HHAT |  | PSTPIP1 |  |
| SAMD9 |  | FSHR |  |
| OTULINL |  | SH2D1A |  |
| HS3ST2 |  | KIR2DL4 |  |
| NT5M |  | GPR68 |  |
| APOL6 |  | IL2RA |  |
| TREM2 |  | TUBGCP4 |  |
| SIDT1 |  | ITK |  |
| ZNF552 |  | SERPINB13 |  |
| TREML2 |  | CASP1 |  |
| GIMAP6 |  | WDR37 |  |
| DHRS9 |  | TBL1Y |  |
| GAL3ST4 |  | CXCR6 |  |
| SLC13A4 |  | HLA-G |  |
| PRDM8 |  | SNCA |  |
| ZBED2 |  | HOPX |  |
| AICDA |  | PTPRO |  |
| CLEC4E |  | HLA-DQB1 |  |
| CCDC87 |  | POU2F2 |  |
| CLEC5A |  | PTAFR |  |
| GPR85 |  | KIR3DL1 |  |
| ZCCHC4 |  | BLVRA |  |
| GALNT6 |  | FCER1A |  |
| UCHL5 |  | EVI2B |  |
| SIGLEC5 |  | EPB41L3 |  |
| P2RY13 |  | FYB1 |  |
| APOBR |  | CACNA1G |  |
| IRAK3 |  | NECTIN1 |  |
| HIVEP3 |  | TBX5 |  |
| PDCD1LG2 |  | PARD6B |  |
| STAP1 |  | PLAUR |  |
| TTC21B |  | RBPJ |  |
| C5AR1 |  | HLA-DPA1 |  |
| ANKRD55 |  | MAZ |  |
| ZBTB32 |  | ATXN7L3B |  |
| GAN |  | TRIM27 |  |
| CLEC2D |  | RHOQ |  |
| TLR7 |  | TCTN3 |  |
| CARD9 |  | ATP2B4 |  |
| DPEP3 |  | VPS39 |  |
| KDM4D |  | KCTD12 |  |
| GALNT10 |  | PREPL |  |
| MAK |  | DST |  |
| CD244 |  | GIGYF2 |  |
| DOK3 |  | MAPK1 |  |
| CCDC121 |  | FNBP1 |  |
| SAMSN1 |  | EPB41L1 |  |
| CYP46A1 |  | KHNYN |  |
| MRNIP |  | UBE3B |  |
| ZNF235 |  | RBM38 |  |
| BATF3 |  | NBEAL2 |  |
| THAP9 |  | NEDD4L |  |
| NME8 |  | RMND5A |  |
| ATP8B4 |  | GPATCH8 |  |
| UBASH3A |  | PICALM |  |
| PLA2G2D |  | ATRN |  |
| BIRC7 |  | UBE2E1 |  |
| CCDC15 |  | DENND5A |  |
| SIRPG |  | PTPRC |  |
| PKDREJ |  | EXOSC7 |  |
| TSPAN32 |  | FKBP15 |  |
| C11orf21 |  | ZNF3 |  |
| PIK3R5 |  | MSL1 |  |
| OSGEPL1 |  | PHLPP1 |  |
| KLRF1 |  | BBS4 |  |
| TNIP3 |  | PPP1R16B |  |
| USP49 |  | MON2 |  |
| TBX21 |  | TLE3 |  |
| NECAP2 |  | PIP4K2A |  |
| CCDC7 |  | ARHGAP45 |  |
| UTS2 |  | ZNF282 |  |
| HRH2 |  | ABR |  |
| TLR8 |  | PHF8 |  |
| NDUFA13 |  | FAM172A |  |
| PRDM12 |  | DENND3 |  |
| WDR19 |  | KANK1 |  |
| CFAP43 |  | MAPK8IP1 |  |
| RNF32 |  | ATP2A3 |  |
| COLEC12 |  | CHI3L2 |  |
| TEX14 |  | PRKCA |  |
| TLR4 |  | ACTR3 |  |
| DENND2D |  | ATP8A1 |  |
| APOL3 |  | OLFML2B |  |
| IKZF3 |  | SS18L1 |  |
| CFAP44 |  | DOCK2 |  |
| NIPSNAP3B |  | MZT2A |  |
| IL26 |  | OTUD3 |  |
| GPR132 |  | ZSCAN26 |  |
| FBXO24 |  | FAM234B |  |
| MSANTD2 |  | TRANK1 |  |
| DCAKD |  | APOOL |  |
| FCRL2 |  | TRIM22 |  |
| IL21 |  | SHANK2 |  |
| RUNX2 |  | SOCS1 |  |
| MZB1 |  | ABCA5 |  |
| DEF6 |  | PGAP4 |  |
| GDF9 |  | ZNF592 |  |
| CTLA4 |  | MFSD9 |  |
| GPR25 |  | CLIC2 |  |
| NPFFR1 |  | ITGA4 |  |
| TAS2R14 |  | TUSC3 |  |
| TAS2R4 |  | ITGAL |  |
| CCL24 |  | LIN37 |  |
| XCR1 |  | CD3D |  |
| MED17 |  | CDK12 |  |
| PRPF18 |  | LDHB |  |
| LAT2 |  | RNASE6 |  |
| FCMR |  | AQP5 |  |
| APOL2 |  | SH3BP1 |  |
| IL21R |  | PHACTR1 |  |
| ETV7 |  | FCHO1 |  |
| NLRP2 |  | TMEM151B |  |
| STYK1 |  | ASAH1 |  |
| CLEC7A |  | XYLT1 |  |
| CLEC4A |  | MYO1F |  |
| EHBP1L1 |  | TRIM66 |  |
| PIK3IP1 |  | RSAD2 |  |
| FBXO42 |  | DUSP7 |  |
| PTPRE |  | SCAF11 |  |
| ZGPAT |  | CD47 |  |
| HLA-F |  | TRIM3 |  |
| TRIM52 |  | NKG7 |  |
| EMILIN2 |  | NIPBL |  |
| HPCAL4 |  | KRT20 |  |
| INO80B |  | CD6 |  |
| PILRA |  | YIPF4 |  |
| TNS4 |  | SOCS7 |  |
| CCL18 |  | IFITM1 |  |
| KRIT1 |  | EFNA5 |  |
| TRAFD1 |  | CCL8 |  |
| RNF19B |  | CD7 |  |
| CAPZB |  | DOK2 |  |
| GNLY |  | MYCL |  |
| GRK2 |  | NCF1 |  |
| STAB1 |  | GLIPR1 |  |
| CD22 |  | FASTK |  |
| WAS |  | CA12 |  |
| STK10 |  | URI1 |  |
| SCYL3 |  | TNFRSF4 |  |
| SIGLEC1 |  | MTMR4 |  |
| SPSB3 |  | MAP4K1 |  |
|  |  | KRAS |  |
|  |  | CTRL |  |
|  |  | ETS1 |  |
|  |  | CTSW |  |
|  |  | IFI44 |  |
|  |  | GPR65 |  |
|  |  | KLRB1 |  |
|  |  | PRKAB2 |  |
|  |  | FSHB |  |
|  |  | PATJ |  |
|  |  | GPR182 |  |
|  |  | MLH3 |  |
|  |  | SSTR5 |  |
|  |  | FPR3 |  |
|  |  | INSL3 |  |
|  |  | LST1 |  |
|  |  | KRT36 |  |
|  |  | FGF12 |  |
|  |  | IVL |  |
|  |  | TPH1 |  |
|  |  | HOXD11 |  |
|  |  | P2RY10 |  |
|  |  | PRF1 |  |
|  |  | OSM |  |
|  |  | MOG |  |
|  |  | GK |  |
|  |  | ALMS1 |  |
|  |  | GATAD1 |  |
|  |  | IPCEF1 |  |
|  |  | DCAF4 |  |
|  |  | MSR1 |  |
|  |  | MEGF8 |  |
|  |  | MYO9B |  |
|  |  | MAP3K1 |  |
|  |  | PLXDC2 |  |
|  |  | RIMBP2 |  |
|  |  | ALPK3 |  |
|  |  | PIWIL1 |  |
|  |  | SYT2 |  |
|  |  | APOBEC3F |  |
|  |  | FNBP1L |  |
|  |  | ZNF33B |  |
|  |  | TRIM58 |  |
|  |  | AIF1 |  |
|  |  | EEF1AKMT2 |  |
|  |  | SPICE1 |  |
|  |  | ADTRP |  |
|  |  | RC3H1 |  |
|  |  | RBMS1 |  |
|  |  | CAMK1G |  |
|  |  | ZNF273 |  |
|  |  | EMX1 |  |
|  |  | LFNG |  |
|  |  | HLA-A |  |
|  |  | EFR3B |  |
|  |  | BTBD18 |  |
|  |  | ZFR2 |  |
|  |  | SUMO4 |  |
|  |  | SORCS3 |  |
|  |  | HLA-DQB2 |  |
|  |  | APOBEC3G |  |
|  |  | LTN1 |  |
|  |  | FGD2 |  |
|  |  | ZNF518A |  |
|  |  | DTX2 |  |
|  |  | RAB40AL |  |
|  |  | LILRA5 |  |
|  |  | PTGDR |  |
|  |  | MAST2 |  |
|  |  | CD72 |  |
|  |  | SLC39A9 |  |
|  |  | ZXDB |  |
|  |  | GARNL3 |  |
|  |  | TAF4B |  |
|  |  | LPXN |  |
|  |  | MYH7 |  |
|  |  | CYSLTR1 |  |
|  |  | HDAC3 |  |
|  |  | SIGLEC8 |  |
|  |  | BAIAP3 |  |
|  |  | TMSB4X |  |
|  |  | TPSAB1 |  |
|  |  | MLLT10 |  |
|  |  | PLCH1 |  |
|  |  | CXCR5 |  |
|  |  | PYHIN1 |  |
|  |  | OSBPL10 |  |
|  |  | CYLC1 |  |
|  |  | RGS1 |  |
|  |  | CMC4 |  |
|  |  | PDE1C |  |
|  |  | ABO |  |
|  |  | DRD2 |  |
|  |  | FCGR1A |  |
|  |  | CXCR4 |  |
|  |  | CXCR3 |  |
|  |  | SIGLEC7 |  |
|  |  | PRDM1 |  |
|  |  | OR2F2 |  |
|  |  | ADRB3 |  |
|  |  | OR7A10 |  |
|  |  | ZHX3 |  |
|  |  | KYNU |  |
|  |  | MT4 |  |
|  |  | ZNF227 |  |
|  |  | B3GALT2 |  |
|  |  | HLA-DMA |  |
|  |  | GRIK5 |  |
|  |  | MILR1 |  |
|  |  | NCKAP1L |  |
|  |  | SCUBE3 |  |
|  |  | PLEKHA2 |  |
|  |  | SERF2 |  |
|  |  | RAB31 |  |
|  |  | CCDC47 |  |
|  |  | ARPC4 |  |
|  |  | EVL |  |
|  |  | SUCLG1 |  |
|  |  | CDC27 |  |
|  |  | LIMA1 |  |
|  |  | PTCD3 |  |
|  |  | HERC2 |  |
|  |  | MAP7D1 |  |
|  |  | TRAPPC4 |  |
|  |  | TTC19 |  |
|  |  | NIBAN1 |  |
|  |  | RNASET2 |  |
|  |  | BAZ1A |  |
|  |  | EFHD2 |  |
|  |  | PTMS |  |
|  |  | CDC42EP4 |  |
|  |  | COMMD9 |  |
|  |  | GGNBP2 |  |
|  |  | FXYD5 |  |
|  |  | TEX2 |  |
|  |  | FTSJ3 |  |
|  |  | MFSD1 |  |
|  |  | GATAD2A |  |
|  |  | SPATA20 |  |
|  |  | TIMM13 |  |
|  |  | LANCL2 |  |
|  |  | PLEKHO1 |  |
|  |  | NAGK |  |
|  |  | C1QA |  |
|  |  | ZDHHC6 |  |
|  |  | DDA1 |  |
|  |  | RMND5B |  |
|  |  | PDP1 |  |
|  |  | PLEKHJ1 |  |
|  |  | RSAD1 |  |
|  |  | CAMK2N1 |  |
|  |  | UBA6 |  |
|  |  | TRAPPC2L |  |
|  |  | LRRFIP2 |  |
|  |  | METTL17 |  |
|  |  | USP21 |  |
|  |  | MED9 |  |
|  |  | MICAL1 |  |
|  |  | PGLS |  |
|  |  | GTF2IRD1 |  |
|  |  | KANK2 |  |
|  |  | REV1 |  |
|  |  | VIPAS39 |  |
|  |  | GID8 |  |
|  |  | PLBD1 |  |
|  |  | COLGALT1 |  |
|  |  | ZNF302 |  |
|  |  | SLC2A4RG |  |
|  |  | RNASEH1 |  |
|  |  | ARHGEF3 |  |
|  |  | SLC35A5 |  |
|  |  | LRRC20 |  |
|  |  | LPAR6 |  |
|  |  | REC8 |  |
|  |  | ZDHHC7 |  |
|  |  | ATP13A2 |  |
|  |  | DRAM1 |  |
|  |  | SMO |  |
|  |  | MKS1 |  |
|  |  | ZXDC |  |
|  |  | CWC25 |  |
|  |  | STX17 |  |
|  |  | ATG7 |  |
|  |  | NCKIPSD |  |
|  |  | SEC22A |  |
|  |  | ICE2 |  |
|  |  | CDK5RAP3 |  |
|  |  | XKR8 |  |
|  |  | DHRS11 |  |
|  |  | PRKCH |  |
|  |  | MSRB2 |  |
|  |  | ACP6 |  |
|  |  | MCUB |  |
|  |  | ORAI2 |  |
|  |  | SLC35F2 |  |
|  |  | SFTPA2 |  |
|  |  | TTC31 |  |
|  |  | WDR33 |  |
|  |  | ACTR3B |  |
|  |  | ARHGAP15 |  |
|  |  | GMIP |  |
|  |  | MTPAP |  |
|  |  | TMPRSS4 |  |
|  |  | SLC2A8 |  |
|  |  | DDX60 |  |
|  |  | C14orf93 |  |
|  |  | EMSY |  |
|  |  | GALNT11 |  |
|  |  | PLAC8 |  |
|  |  | PARP16 |  |
|  |  | CORO7 |  |
|  |  | THNSL2 |  |
|  |  | LYVE1 |  |
|  |  | ANKRD49 |  |
|  |  | NSD1 |  |
|  |  | ZNF576 |  |
|  |  | GAR1 |  |
|  |  | SLAMF7 |  |
|  |  | ATG2B |  |
|  |  | FSD1 |  |
|  |  | CYTH4 |  |
|  |  | FKBPL |  |
|  |  | AGO4 |  |
|  |  | SEMA4G |  |
|  |  | RHBDF2 |  |
|  |  | IFIH1 |  |
|  |  | RAB8B |  |
|  |  | USP18 |  |
|  |  | PGBD5 |  |
|  |  | CCNJL |  |
|  |  | GIMAP4 |  |
|  |  | SEMA4A |  |
|  |  | SUV39H2 |  |
|  |  | DOCK10 |  |
|  |  | TRPV2 |  |
|  |  | ZNF219 |  |
|  |  | HIF3A |  |
|  |  | IL18BP |  |
|  |  | ELAC1 |  |
|  |  | GPRC5C |  |
|  |  | KLHDC8A |  |
|  |  | NABP1 |  |
|  |  | HERC6 |  |
|  |  | RADX |  |
|  |  | ADAP2 |  |
|  |  | DHX58 |  |
|  |  | POLH |  |
|  |  | CPLANE1 |  |
|  |  | SLAMF8 |  |
|  |  | NEIL1 |  |
|  |  | XYLT2 |  |
|  |  | HPSE |  |
|  |  | RAB38 |  |
|  |  | EBI3 |  |
|  |  | TREM1 |  |
|  |  | ANKRD11 |  |
|  |  | LRRK1 |  |
|  |  | BCORL1 |  |
|  |  | DPEP2 |  |
|  |  | LAMP5 |  |
|  |  | RUBCNL |  |
|  |  | SEC61A2 |  |
|  |  | C1orf54 |  |
|  |  | BCL11B |  |
|  |  | EAF2 |  |
|  |  | MARCHF1 |  |
|  |  | RAB3IL1 |  |
|  |  | OGFRL1 |  |
|  |  | PLA1A |  |
|  |  | TMEM143 |  |
|  |  | SLC15A3 |  |
|  |  | THAP10 |  |
|  |  | PIEZO2 |  |
|  |  | MS4A4A |  |
|  |  | ARHGEF28 |  |
|  |  | CAMKMT |  |
|  |  | TOR4A |  |
|  |  | RAB20 |  |
|  |  | ZNF606 |  |
|  |  | DPPA4 |  |
|  |  | MS4A6A |  |
|  |  | BANK1 |  |
|  |  | AHSP |  |
|  |  | UXS1 |  |
|  |  | IGFLR1 |  |
|  |  | SAMD9 |  |
|  |  | OTULINL |  |
|  |  | SMPD3 |  |
|  |  | HS3ST2 |  |
|  |  | YBX2 |  |
|  |  | NT5M |  |
|  |  | CACNA2D3 |  |
|  |  | SIDT1 |  |
|  |  | FN3K |  |
|  |  | SETD6 |  |
|  |  | POF1B |  |
|  |  | GIMAP6 |  |
|  |  | DHRS9 |  |
|  |  | PVRIG |  |
|  |  | LATS1 |  |
|  |  | GPATCH1 |  |
|  |  | CDKL3 |  |
|  |  | PRDM8 |  |
|  |  | ZBED2 |  |
|  |  | ZNF432 |  |
|  |  | LY6G5C |  |
|  |  | HERC5 |  |
|  |  | CLEC5A |  |
|  |  | TM6SF1 |  |
|  |  | ZNF446 |  |
|  |  | CRNKL1 |  |
|  |  | TRIM45 |  |
|  |  | LRRC2 |  |
|  |  | GALNT6 |  |
|  |  | KIZ |  |
|  |  | DUSP13 |  |
|  |  | SIGLEC5 |  |
|  |  | P2RY13 |  |
|  |  | EFCC1 |  |
|  |  | APOBR |  |
|  |  | IRAK3 |  |
|  |  | IL22RA1 |  |
|  |  | GID4 |  |
|  |  | STAP1 |  |
|  |  | NOD2 |  |
|  |  | VPREB3 |  |
|  |  | PPP1R14D |  |
|  |  | C5AR1 |  |
|  |  | SLC2A6 |  |
|  |  | CNTLN |  |
|  |  | FBXL12 |  |
|  |  | LTB4R2 |  |
|  |  | TLR7 |  |
|  |  | FAM184A |  |
|  |  | C10orf95 |  |
|  |  | ENTPD7 |  |
|  |  | KPTN |  |
|  |  | CARD9 |  |
|  |  | CCDC68 |  |
|  |  | GKN1 |  |
|  |  | SH3D21 |  |
|  |  | TPTE |  |
|  |  | FBXO17 |  |
|  |  | ZBBX |  |
|  |  | KDM4D |  |
|  |  | TRIM17 |  |
|  |  | CD244 |  |
|  |  | DOK3 |  |
|  |  | CCDC121 |  |
|  |  | SAMSN1 |  |
|  |  | CYP46A1 |  |
|  |  | BATF3 |  |
|  |  | PSORS1C1 |  |
|  |  | ELSPBP1 |  |
|  |  | ABCG5 |  |
|  |  | AGBL2 |  |
|  |  | ATP8B4 |  |
|  |  | COQ8B |  |
|  |  | VAX2 |  |
|  |  | KCNK12 |  |
|  |  | CCDC15 |  |
|  |  | GPR75 |  |
|  |  | SIRPG |  |
|  |  | BCAS3 |  |
|  |  | OTOF |  |
|  |  | TXNDC15 |  |
|  |  | AUP1 |  |
|  |  | PRPF39 |  |
|  |  | TSPAN32 |  |
|  |  | KLK14 |  |
|  |  | ADGB |  |
|  |  | FAR2 |  |
|  |  | TSGA10 |  |
|  |  | KLHL11 |  |
|  |  | RDH8 |  |
|  |  | CCDC82 |  |
|  |  | KCNK10 |  |
|  |  | ZNF778 |  |
|  |  | NECAP2 |  |
|  |  | IL19 |  |
|  |  | KIF13A |  |
|  |  | UTS2 |  |
|  |  | CTNNA3 |  |
|  |  | TRPC4 |  |
|  |  | TLR8 |  |
|  |  | ZNF407 |  |
|  |  | CFAP43 |  |
|  |  | PLEKHA5 |  |
|  |  | ULK4 |  |
|  |  | SPACA1 |  |
|  |  | UNC93B1 |  |
|  |  | TSPAN14 |  |
|  |  | COLEC12 |  |
|  |  | SCRT1 |  |
|  |  | APH1B |  |
|  |  | PER3 |  |
|  |  | NMRK2 |  |
|  |  | TLR4 |  |
|  |  | PKD2L1 |  |
|  |  | NOD1 |  |
|  |  | DENND1C |  |
|  |  | DENND2D |  |
|  |  | FEZF2 |  |
|  |  | APOL3 |  |
|  |  | INSL5 |  |
|  |  | TMCO6 |  |
|  |  | GPR132 |  |
|  |  | ASCL3 |  |
|  |  | PRDM13 |  |
|  |  | HRH4 |  |
|  |  | FUZ |  |
|  |  | NPL |  |
|  |  | C1orf56 |  |
|  |  | DCAKD |  |
|  |  | FCRL2 |  |
|  |  | FZD5 |  |
|  |  | SLC2A11 |  |
|  |  | DCSTAMP |  |
|  |  | ABHD17A |  |
|  |  | SH3BGRL3 |  |
|  |  | GDAP1 |  |
|  |  | ST8SIA2 |  |
|  |  | MZB1 |  |
|  |  | PWWP3A |  |
|  |  | DEF6 |  |
|  |  | FGF22 |  |
|  |  | BCL2L10 |  |
|  |  | CLDN17 |  |
|  |  | OR52A1 |  |
|  |  | CTLA4 |  |
|  |  | OR10J1 |  |
|  |  | NPPC |  |
|  |  | VPREB1 |  |
|  |  | NMUR1 |  |
|  |  | OR1A1 |  |
|  |  | PLA2G2F |  |
|  |  | HYI |  |
|  |  | ADAM30 |  |
|  |  | BTNL2 |  |
|  |  | BHLHE41 |  |
|  |  | ST6GALNAC4 |  |
|  |  | TRAF3 |  |
|  |  | LAT2 |  |
|  |  | FCMR |  |
|  |  | INTS13 |  |
|  |  | PYCARD |  |
|  |  | ETV7 |  |
|  |  | CLEC7A |  |
|  |  | CLEC4A |  |
|  |  | CELF1 |  |
|  |  | HMGCS1 |  |
|  |  | PANK3 |  |
|  |  | EHBP1L1 |  |
|  |  | PIK3IP1 |  |
|  |  | FBXO42 |  |
|  |  | RAB35 |  |
|  |  | PTPRE |  |
|  |  | KLF4 |  |
|  |  | MEAK7 |  |
|  |  | SDHAF1 |  |
|  |  | TBC1D12 |  |
|  |  | HLA-F |  |
|  |  | C2orf68 |  |
|  |  | TRIM52 |  |
|  |  | TMEM80 |  |
|  |  | LRCH4 |  |
|  |  | COL9A1 |  |
|  |  | CEMP1 |  |
|  |  | P4HTM |  |
|  |  | MRPL17 |  |
|  |  | PILRA |  |
|  |  | ALKBH4 |  |
|  |  | ZNF112 |  |
|  |  | POLM |  |
|  |  | KLK5 |  |
|  |  | ZNF480 |  |
|  |  | TRDN |  |
|  |  | ZNF324B |  |
|  |  | ALS2CL |  |
|  |  | TBX10 |  |
|  |  | IGHMBP2 |  |
|  |  | SLC25A44 |  |
|  |  | CCL18 |  |
|  |  | AGPAT1 |  |
|  |  | TRAFD1 |  |
|  |  | GNLY |  |
|  |  | DXO |  |
|  |  | MADD |  |
|  |  | GRK2 |  |
|  |  | STAB1 |  |
|  |  | CD22 |  |
|  |  | WAS |  |
|  |  | SPHK2 |  |
|  |  | FOXA2 |  |
|  |  | STK10 |  |
|  |  | LPCAT4 |  |
|  |  | SIGLEC1 |  |
|  |  | HEY1 |  |
|  |  | RIPOR1 |  |
|  |  | KLHL22 |  |
|  |  | MYO15B |  |
|  |  | CASKIN2 |  |
|  |  | ENGASE |  |
|  |  | ADAP1 |  |

**Table S3 Baseline Characteristics of the Guangxi Cohort (N=13)**

| **Characteristics** | **levels** | ***Response (N=4)** | **Non-Response (N=9)** | ***P*** |
| --- | --- | --- | --- | --- |
| Age(years) | Mean ± SD | 42.0 ± 7.6 | 49.8 ± 11.5 | 0.246 |
| BMI(kg/m2) | Mean ± SD | 22.3 ± 3.6 | 25.4 ± 3.1 | 0.145 |
| Smoking | No | 2 (50%) | 4 (44.4%) | >0.999 |
|  | Yes | 2 (50%) | 5 (55.6%) |  |
| Drinking | No | 2 (50%) | 5 (55.6%) | >0.999 |
|  | Yes | 2 (50%) | 4 (44.4%) |  |
| HBV infection | No | 0 (0%) | 1 (11.1%) | >0.999 |
|  | Yes | 4 (100%) | 8 (88.9%) |  |
| HBV DNA(IU/ml) | <1000 | 1 (25%) | 3 (33.3%) | >0.999 |
|  | ≥1000 | 3 (75%) | 6 (66.7%) |  |
| Cirrhosis | No | 1 (25%) | 3 (33.3%) | >0.999 |
|  | Yes | 3 (75%) | 6 (66.7%) |  |
| Alpha fetoprotein(ng/ml) | Median (IQR) | 96.4 (15.1 to 31686.2) | 24.8 (11.3 to 307.0) | 0.94 |
| PIVKA-Ⅱ(mAU/ml) | Median (IQR) | 2149.8 (1046.7 to 36978.1) | 816.0 (464.9 to 4053.8) | 0.604 |
| Number of tumors | Single | 4 (100%) | 7 (77.8%) | >0.999 |
|  | Multiple | 0 (0%) | 2 (22.2%) |  |
| Tumor diameter(cm) | Mean ± SD | 10.3 ± 1.0 | 7.1 ± 3.0 | 0.063 |
| BCLC | A | 2 (50%) | 4 (44.4%) | >0.999 |
|  | B | 0 (0%) | 1 (11.1%) |  |
|  | C | 2 (50%) | 4 (44.4%) |  |
| CNLC | Ⅰa | 0 (0%) | 2 (22.2%) | 0.832 |
|  | Ⅰb | 2 (50%) | 2 (22.2%) |  |
|  | Ⅱa | 0 (0%) | 1 (11.1%) |  |
|  | Ⅲa | 2 (50%) | 4 (44.4%) |  |
| PVTT | No | 2 (50%) | 6 (66.7%) | >0.999 |
|  | Yes | 2 (50%) | 3 (33.3%) |  |
| *Tumor efficacy was evaluated based on mRECIST criteria. BMI, Body Mass Index; HBV, Hepatitis B virus ; PIVKA-Ⅱ, protein induced by vitamin K absence or antagonist- Ⅱ; BCLC, Barcelona Clinic Liver Cancer staging; CNLC, Chinese National Liver Cancer staging; PVTT, Portal Vein Tumor Thrombosis. | | | | |
